# Supplementary material for: Defining the combinatorial nature of gene modules in prostate cancer underlying lineage plasticity and metastasis
Source: Research Square preprint supplement (doi:10.21203/rs.3.rs-9430776/v1), 2026-05-11
Supplement: Supplementary file 1 [file 8e893616c4f4af994286b266.pdf]

# Supplementary Information

Supp Figure 1

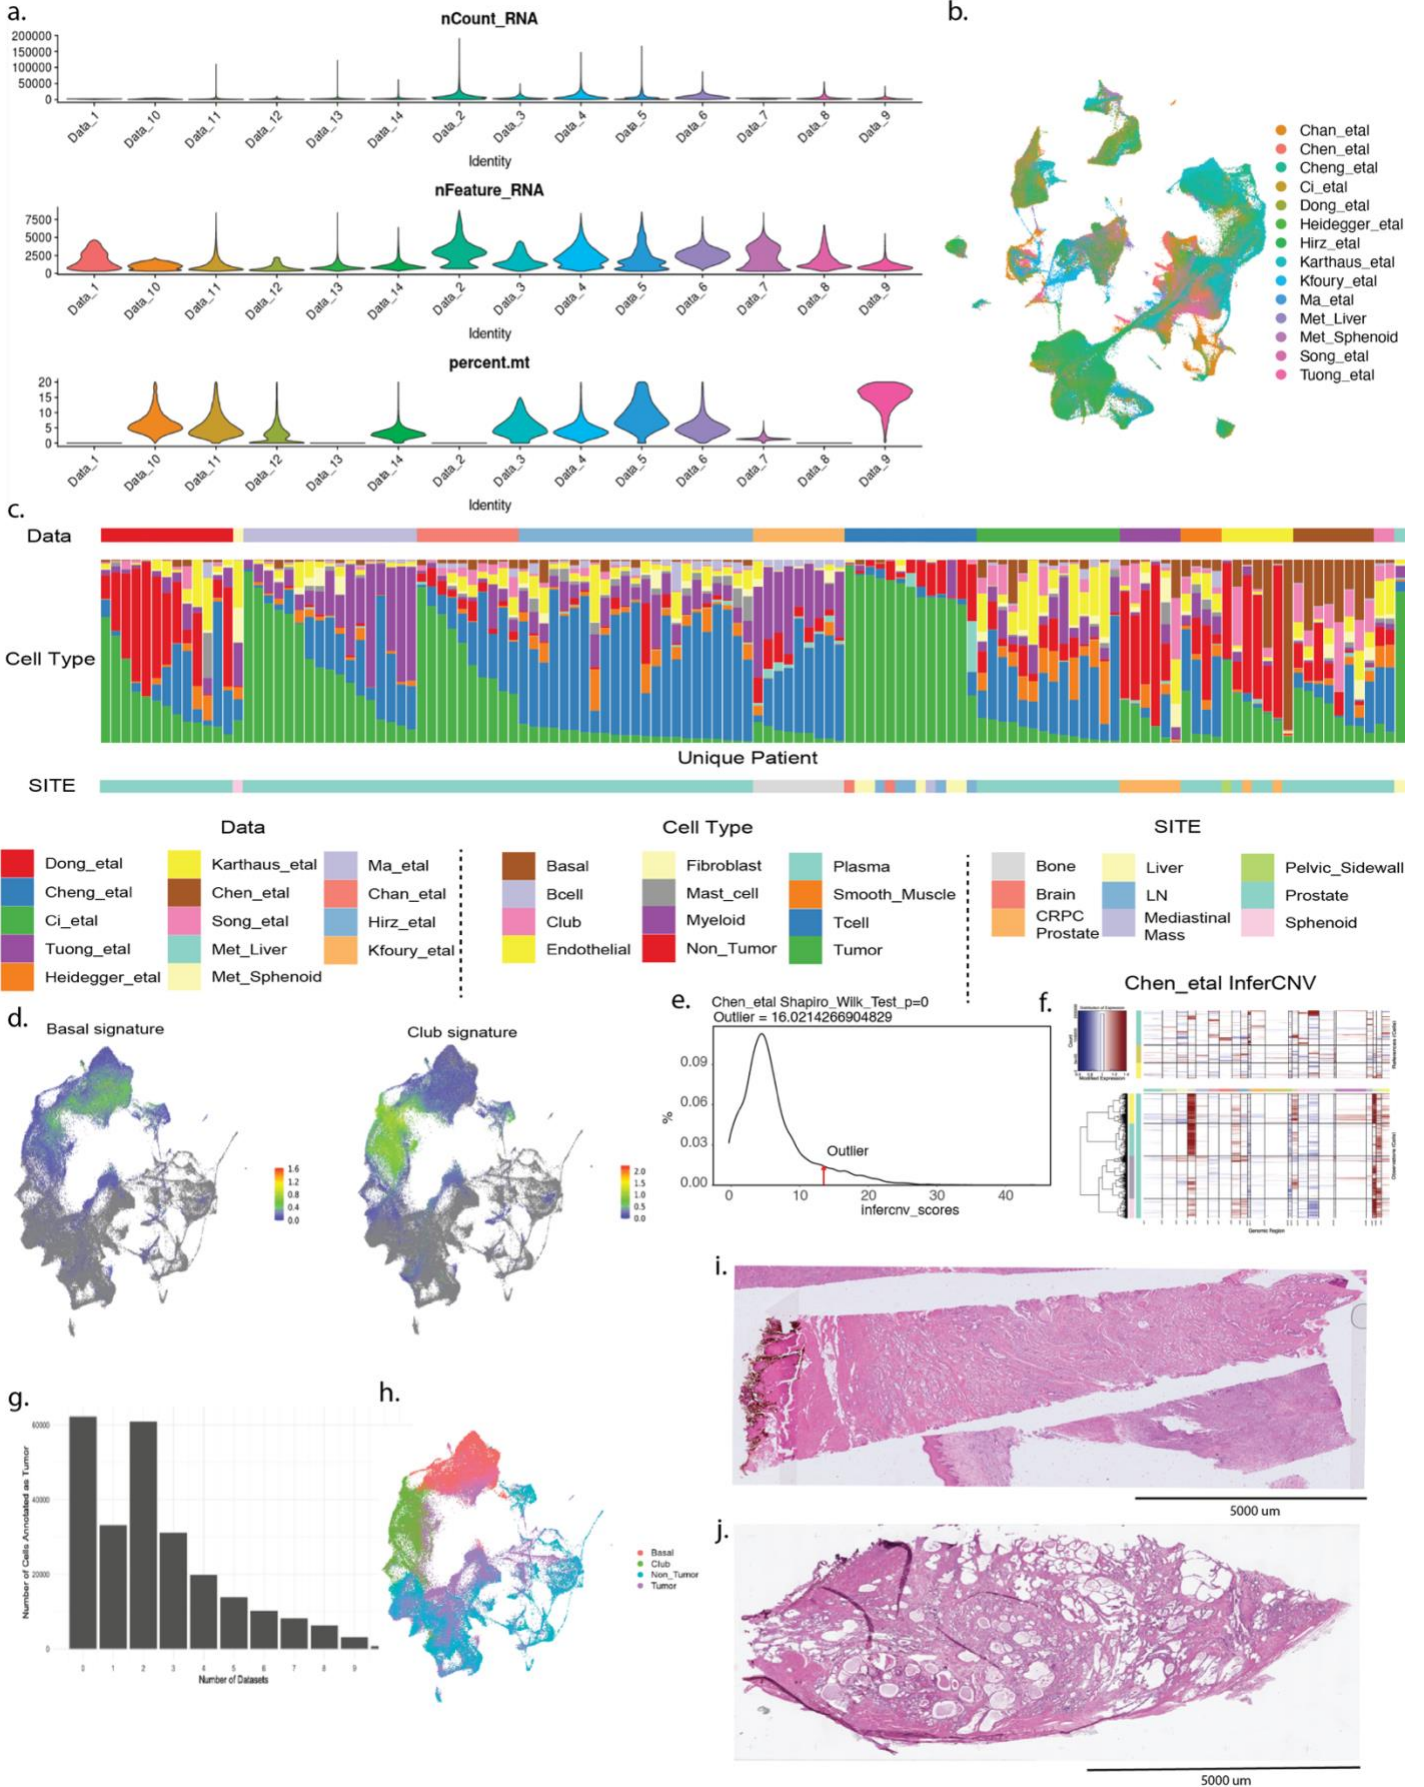

## Supp Figure 1. Quality control and integration metrics for the PCa scRNA-seq atlas

**a.** Violin plots showing the distribution of nCount\_RNA, nFeature\_RNA, and percent mitochondrial reads across each dataset included in the integration. **b.** UMAP plot colored by dataset ID demonstrating integration of samples. **c.** Stacked bar plot showing cell type composition across unique patients, colored by cell type annotation with site annotation shown below. **d.** Feature plots showing basal and club epithelial signature scores projected onto the integrated UMAP. **e.** Distribution of copy number scores for all the epithelial cells and the red arrow marks the threshold above which cells are considered to harbor outlier high copy number changes. **f.** Example inferCNV heatmap for one dataset in the atlas using all the non-tumor epithelial cells as reference (up) and inferred copy number profiles for the unknown cells (down). Copy numbers are represented in a blue-red color scheme (blue: deletion, red: amplification). **g.** Bar plot showing the number of predicted tumor cells by different model training results. **h.** UMAP visualization of epithelial cells colored by epithelial subtype. **i.** H&E staining image of the first FFPE localized prostate cancer sample sequenced using the Xenium 5k gene panel. **j.** H&E staining image of the second FFPE localized prostate cancer sample sequenced using the Xenium 5k gene panel.

Supp Figure 2

a. Fixed Variation vs. Nested Random Variation

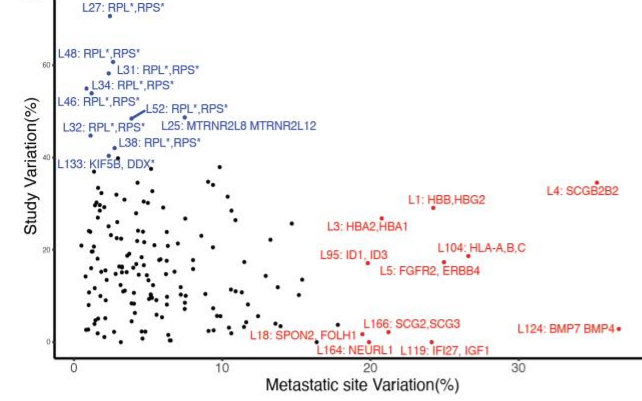

b.

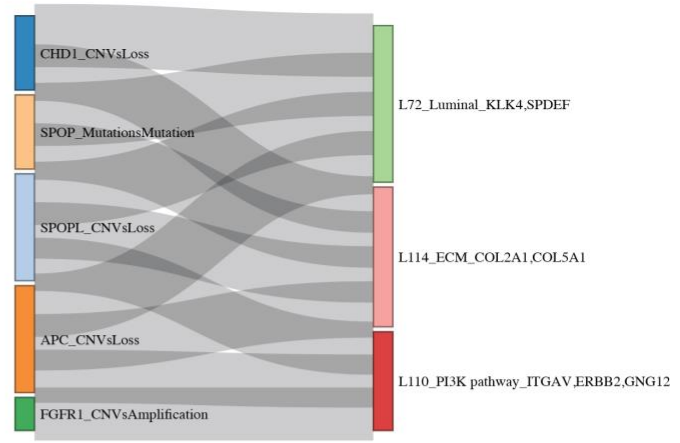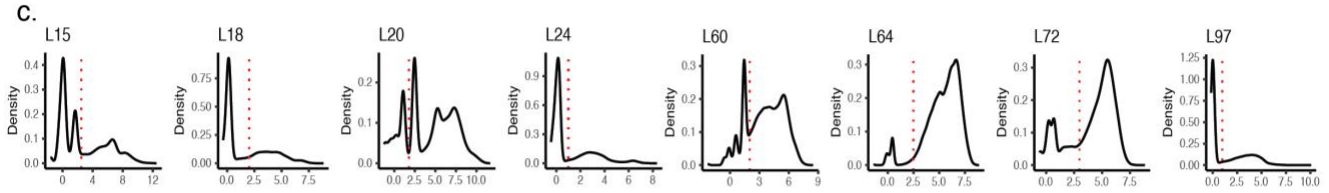

Distribution of luminal modules expression in all tumor cells

d. Epithelial subtypes in healthy prostate

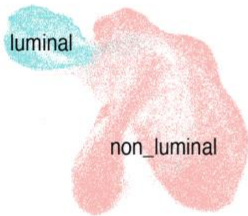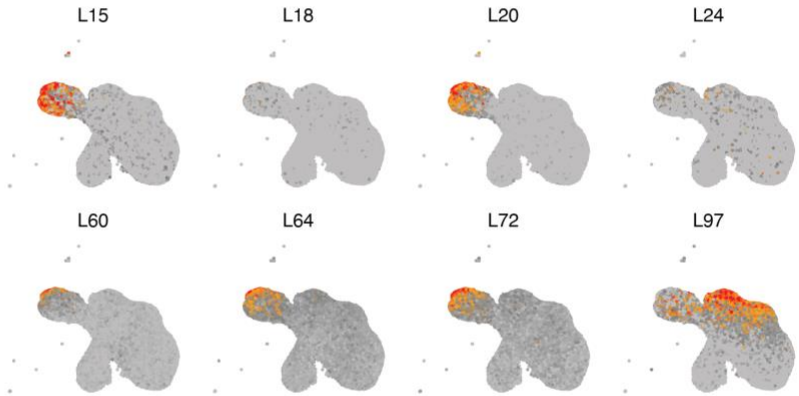

Luminal modules expression in all Healthy prostate epithelial cells

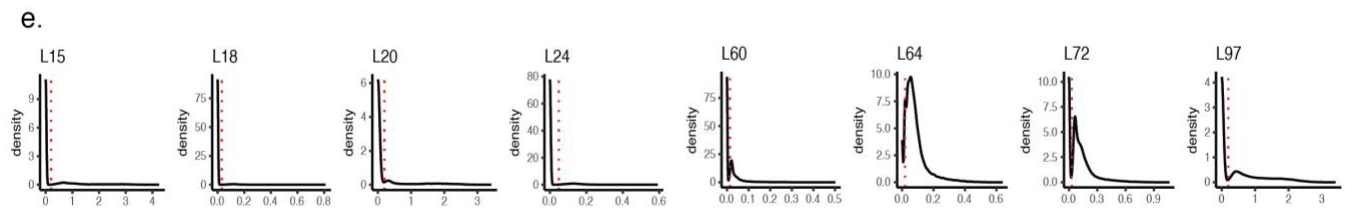

Distribution of luminal modules expression in all Healthy prostate epithelial cells

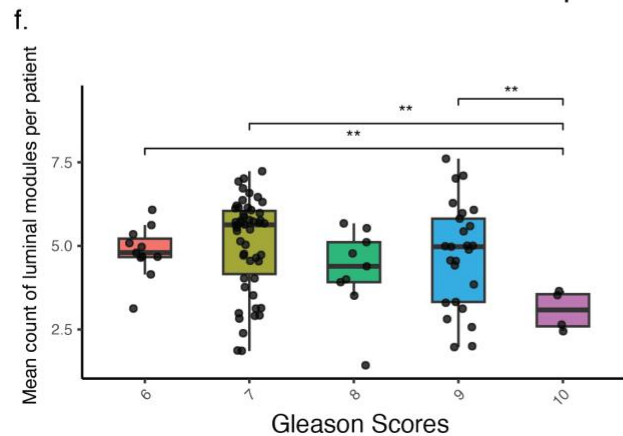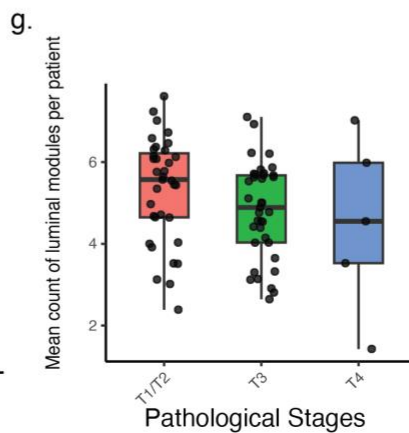

**Supp Figure 2. Classification of gene modules association and luminal module expression subtyping.**

**a.** Site variation percentage vs study variation percentage for each gene co-expression module. **b.** Connection between genetic mutation and different module expression in TCGA. **c.** Density plot of luminal modules expression in all tumor cells. **d.** Luminal modules expression in all Healthy prostate epithelial cells shown in UMAP. **e.** Density plot of luminal modules expression in all Healthy prostate epithelial cells. **f.** Association between Gleason score and average number of cellular expressed luminal modules per patient. **g.** Association between tumor stage and average number of cellular expressed luminal modules per patient.

Supp Figure 3

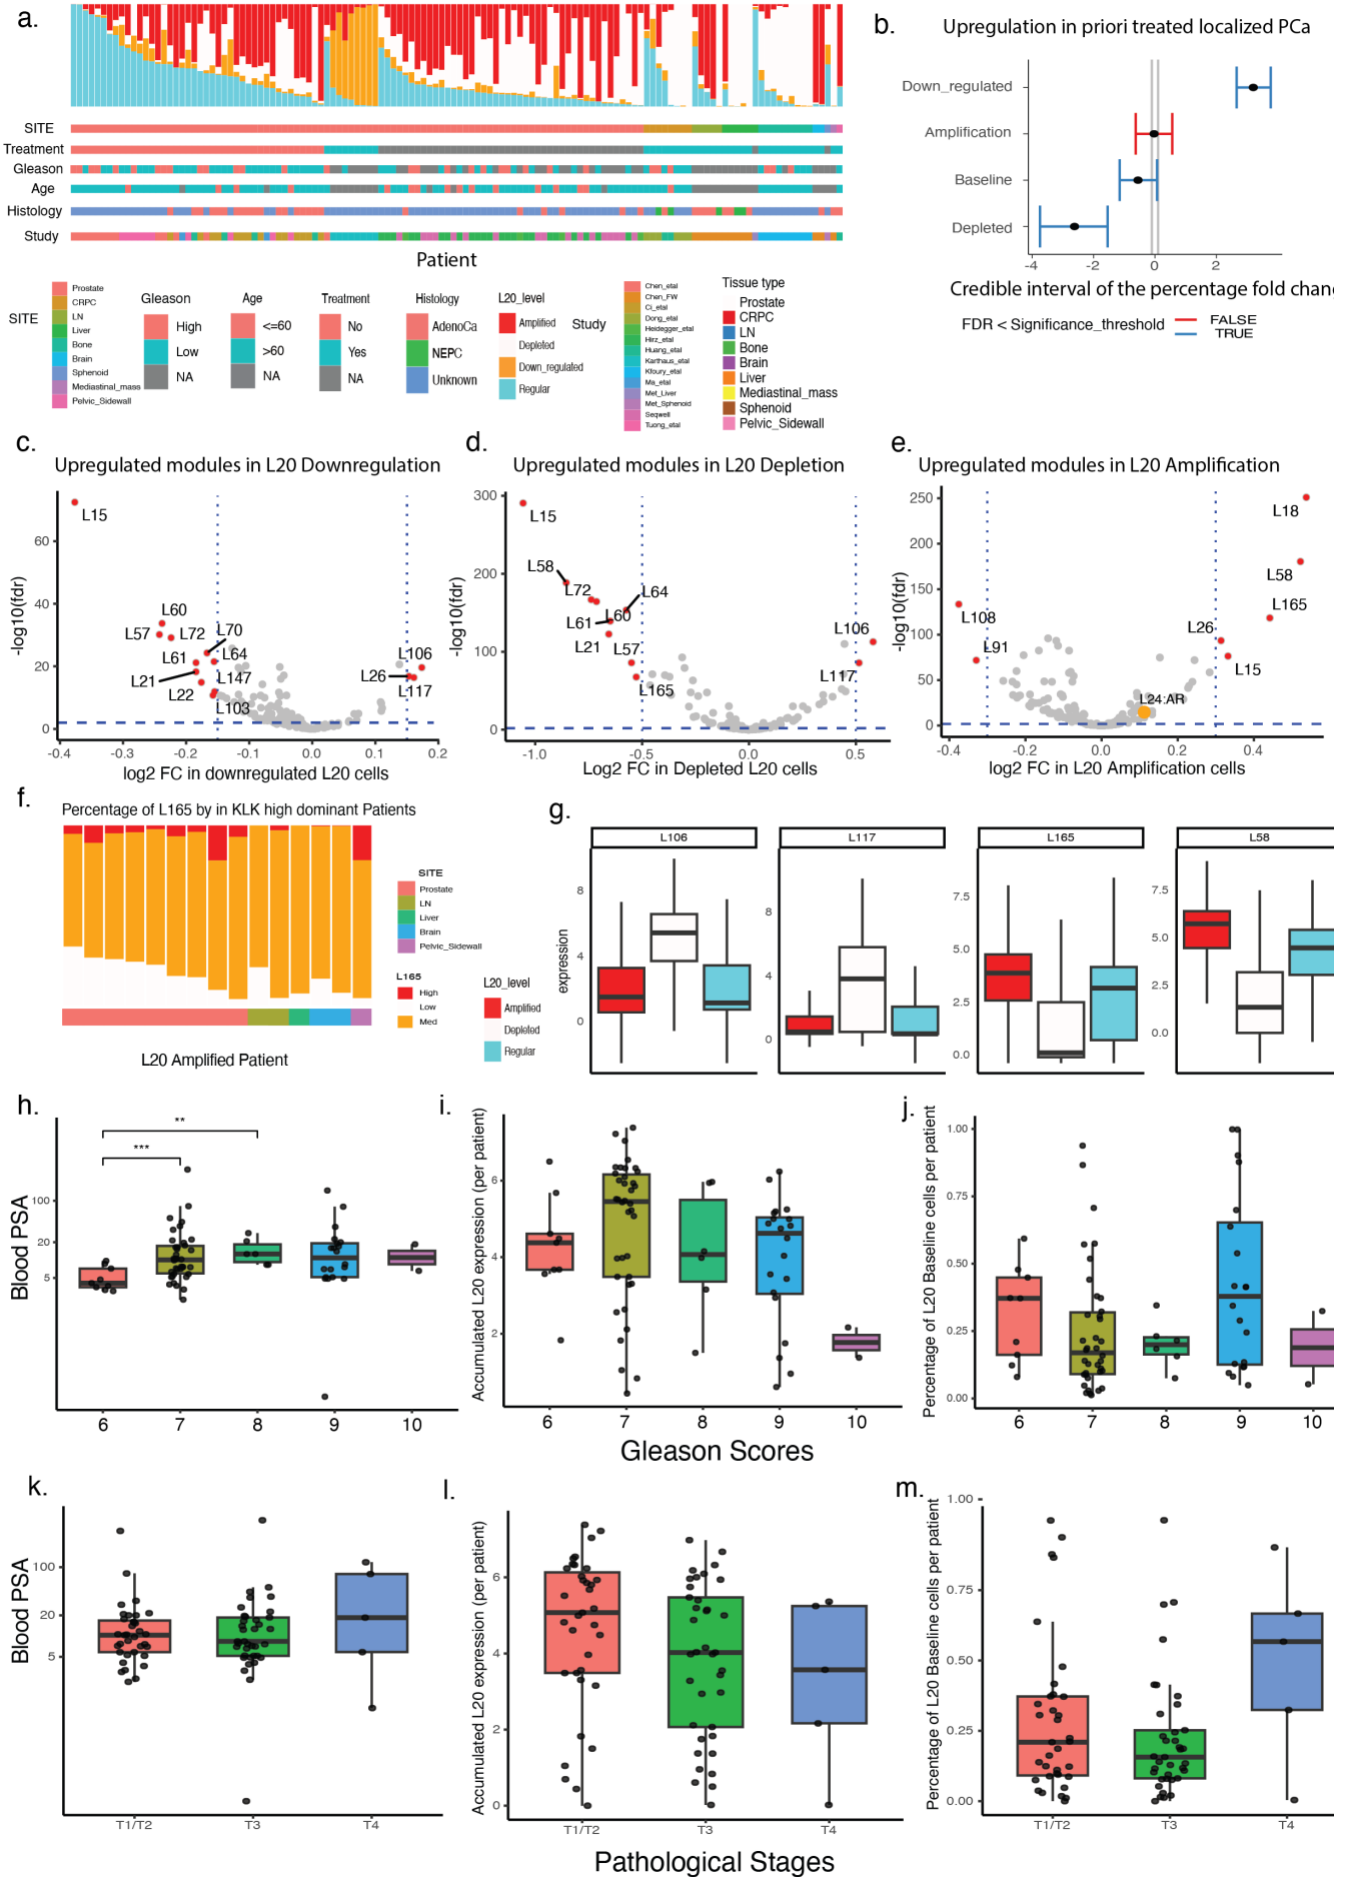

### **Supp Figure 3. Delineating L20(KLK2/3) module expression categories and clinical association**

**a.** Spectrum of composition of L20(KLK2/3) expression categories across patient labelled by clinical metadata. **b.** Credible interval of the percentage fold change for different L20 expression cell types in different localized prostate cancer from sccomp analysis. **c-e** volcano plot of differential module expression between L20 down-regulation, L20 depleted and L20 amplification cells compared to L20 baseline. **f.** Composition of L165(MS4A8, HOXA10) expression subtypes in patients with >75% L20-amplification cells. **g.** Cellular module expression of L106, L117, L165 and L57 in different L20 expression subtypes. **h-j** Association between Gleason score and blood PSA, accumulated L20 expression and percent L20 baseline tumor cells. **k-m** Association between tumor stage and blood PSA, accumulated L20 expression and percent L20 baseline tumor cells.

# Supp Figure 4

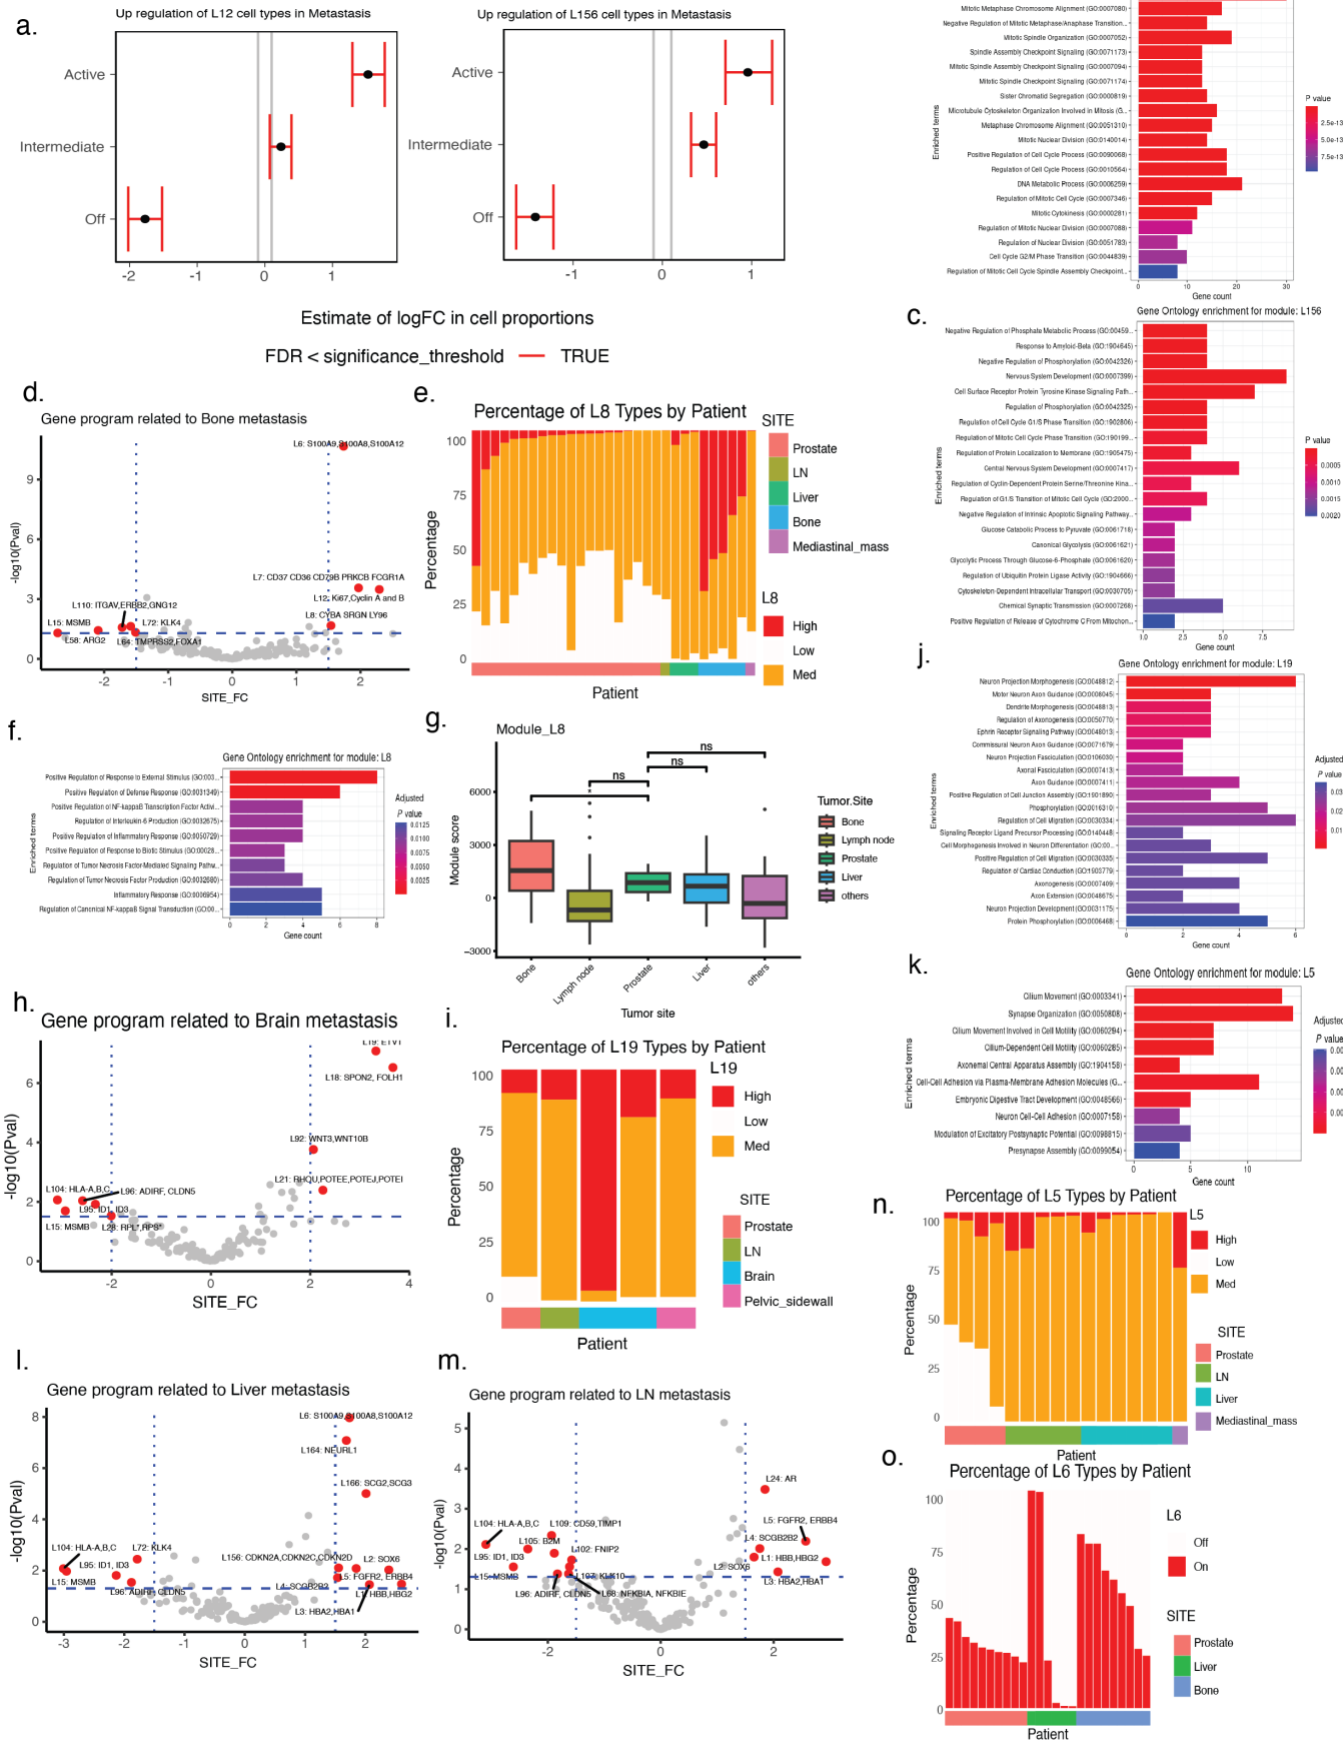

#### **Supp Figure 4. Dissecting biological functions of metastasis associated modules.**

**a.** Credible interval of the percentage fold change for different L12 and L156 expression cell types in metastasis vs localized prostate cancer from scomp analysis. **b.** Gene Ontology enrichment for genes in module L12. **c.** Gene Ontology enrichment for genes in module L156. **d.** Volcano plot of differential module expression in liver metastasis compared to localized PCa. **e.** Composition of L6 expression cell types in different patient. **f.** Volcano plot of differential module expression in bone metastasis compared to localized PCa. **g.** Composition of L8 expression cell types in different patient. **h.** Gene Ontology enrichment for genes in module L8. **i.** Module Expression score of L8 in different metastatic sites in SU2C dataset. **j.** Volcano plot of differential module expression in Brain metastasis compared to localized PCa. **k.** Composition of L19 expression cell types in different patient. **l.** Gene Ontology enrichment for genes in module L19. **m.** Volcano plot of differential module expression in lymph nodes metastasis compared to localized PCa. **n.** Composition of L5 expression cell types in different patient. **o.** Gene Ontology enrichment for genes in module L5. **p.** Module Expression score of L8 in different metastatic sites in SU2C dataset.

# Supp Figure 5

a.

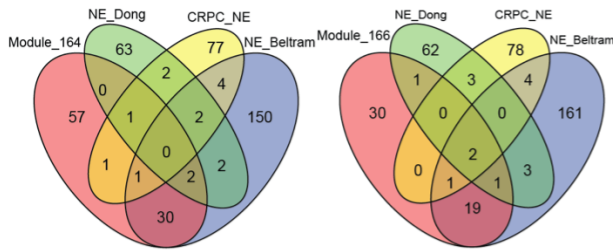

b.

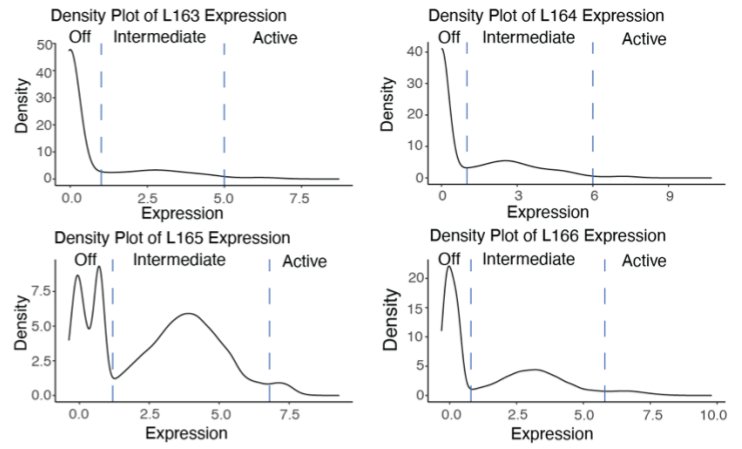

c.

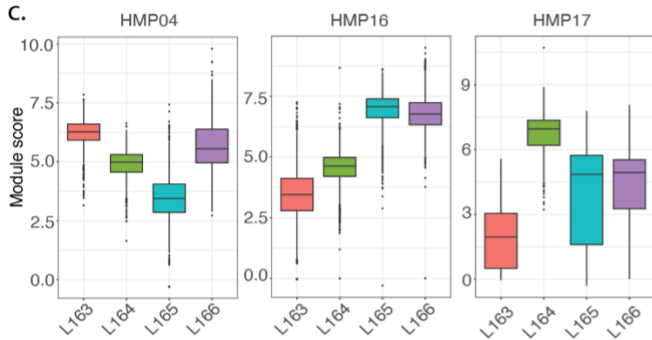

d.

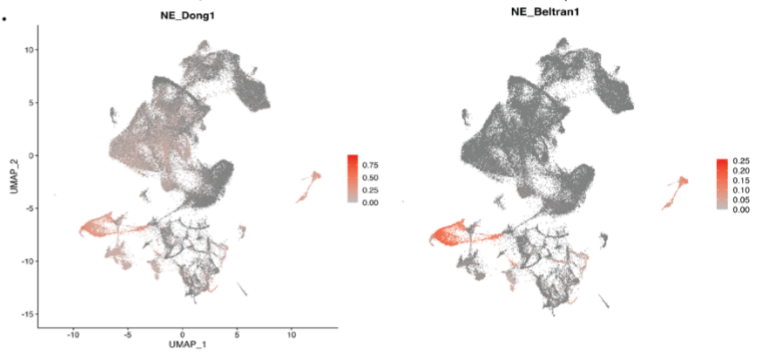

e.

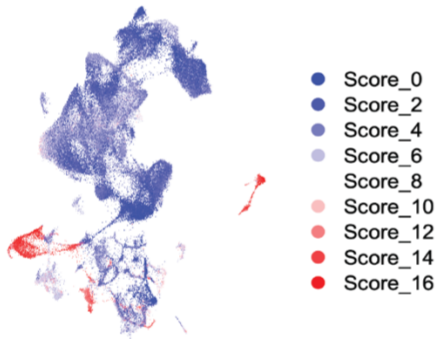

f.

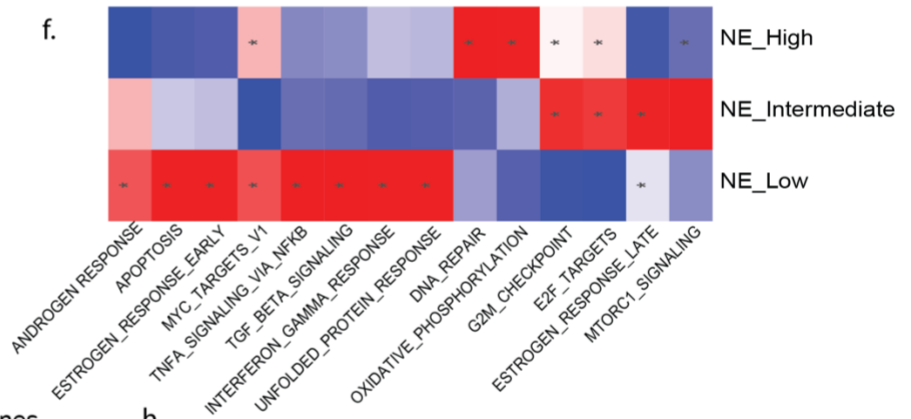

g.

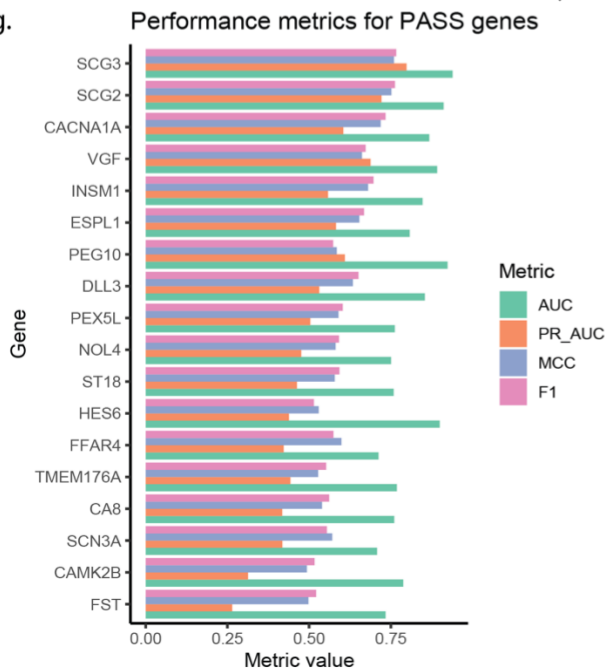

h.

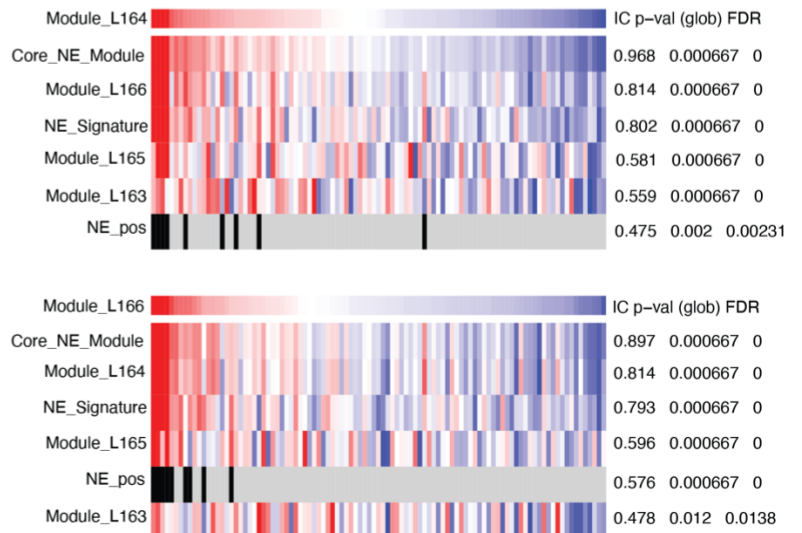

## Supp Figure 5. Neuroendocrine-like module analysis across PCa datasets

**a.** Venn diagrams showing gene overlapping between Modules L164 and L166 and previously established NE signatures (NE\_Dong, NE\_Beltran, CRPC\_NE). **b.** Density plot of module scores across tumor cells for Modules L163-L166, classified into three categories, Off (low), Intermediate, and Active (high) based on the distribution. **c.** Box plots showing module scores for L163-L166 across tumor cells from three NEPC patients (HMP04, HMP16, HMP17). **d.** Feature plots showing neuroendocrine signature scores (NE\_Dong, NE\_Beltran) across tumor cells, highlighting enrichment in subsets of NE-like cells. **e.** UMAP of tumor cells colored by NE scores (0–16), demonstrating a gradient distribution of NE module scores across the tumor cell population. **f.** Gene set enrichment analysis result showing the significantly enriched pathways for NE\_low, NE\_intermediate and NE\_high gene sets. **g.** Bar chart summarizing performance metrics (AUC, PR-AUC, MCC, F1) for the 18-gene NE. **h.** ssGSEA heatmaps of NE-associated between the two core lineage NE modules (L164 and L164) and other NE signatures/modules in the SU2C dataset, showing information content (IC), association p-values, and FDR for each signature.

Supp Figure 6

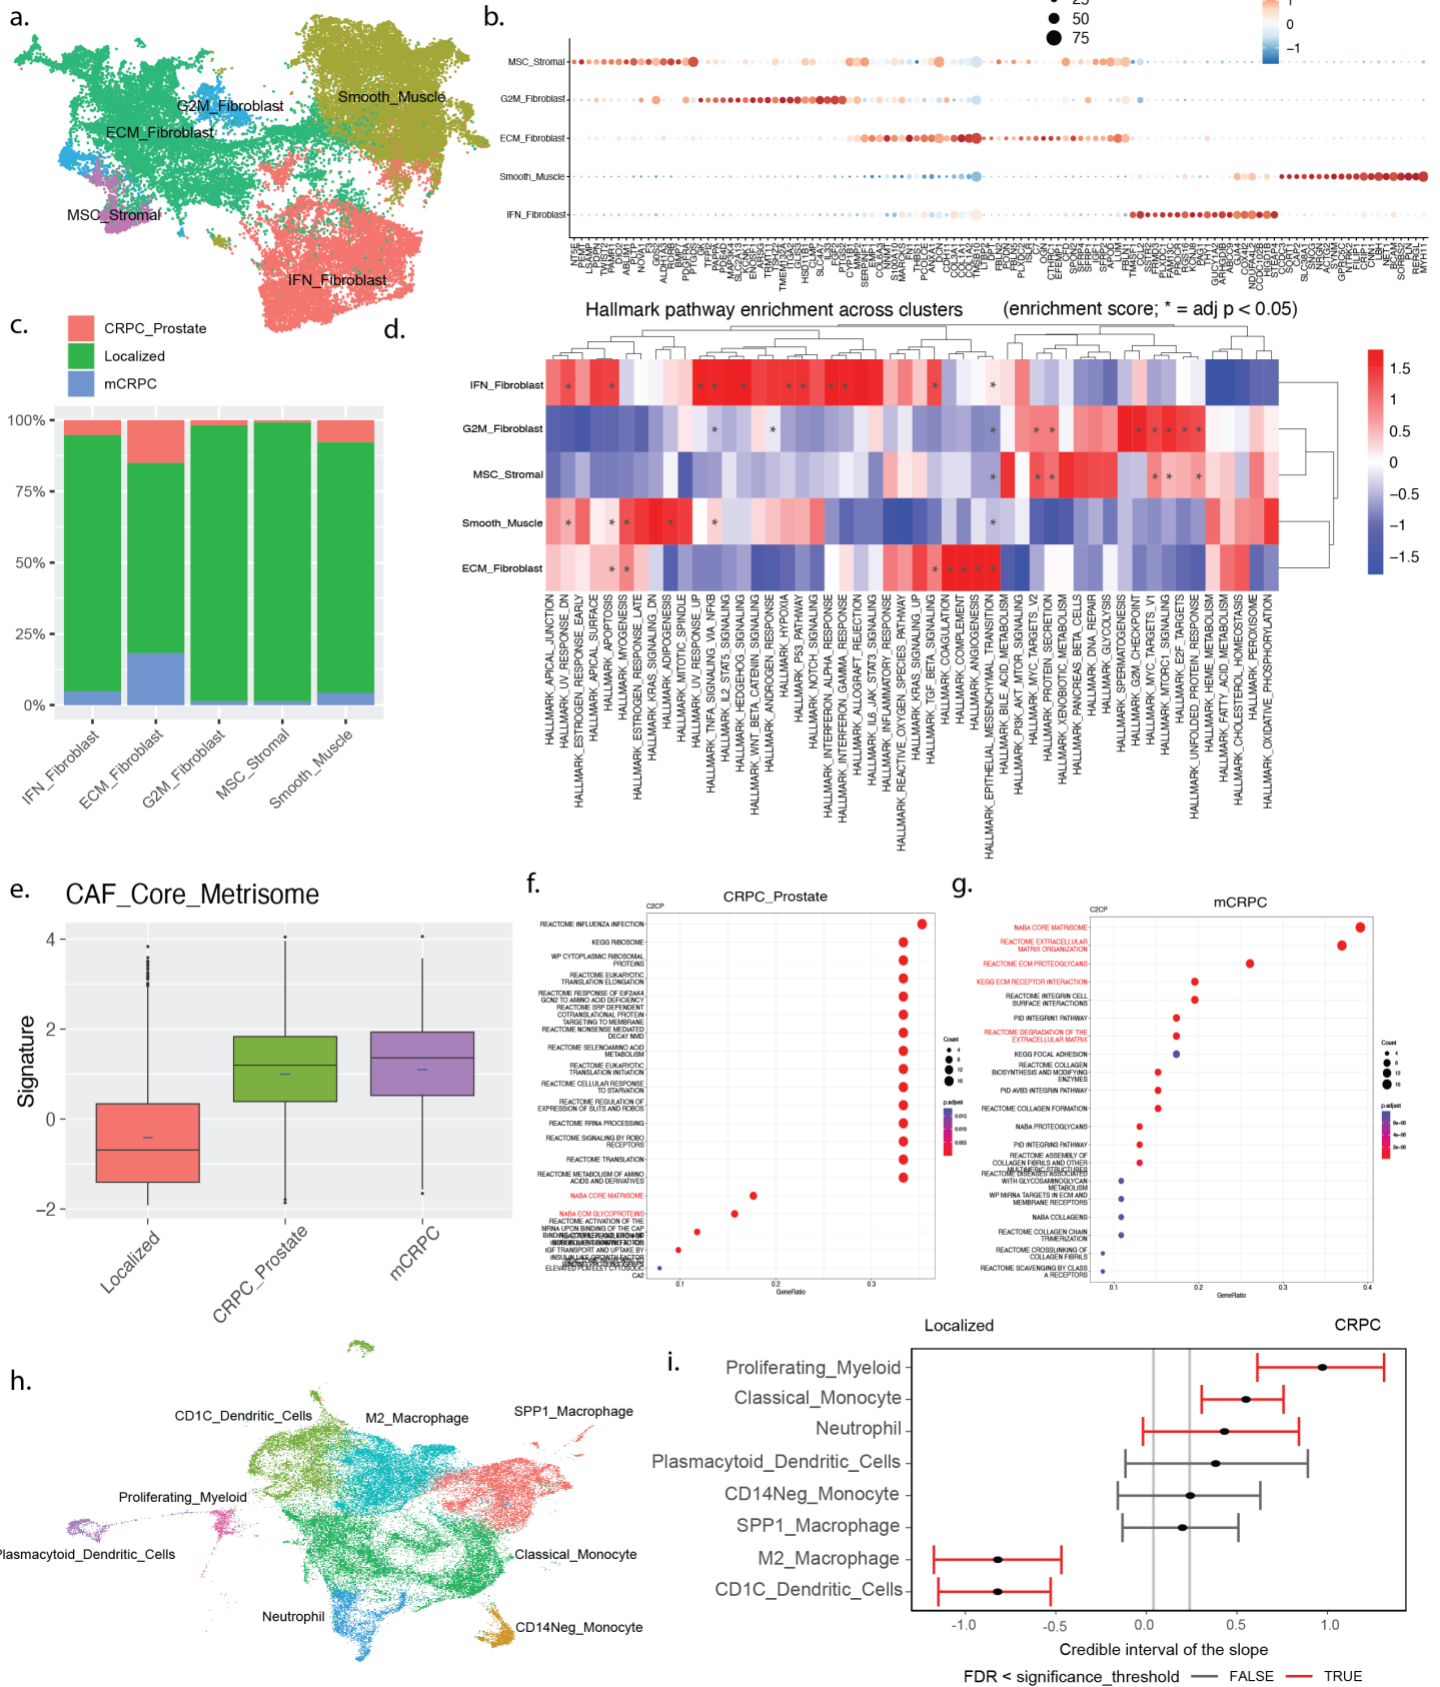

## Supp Figure 6. Clustering and characterization of stromal cell populations in the PCa scRNA-seq atlas

**a.** UMAP plot showing stromal clustering results with clusters annotated as ECM fibroblasts, MSC stromal cells, smooth muscle cells, G2M fibroblasts, and IFN fibroblasts. **b.** Dot plot of selected marker genes across stromal clusters with dot size indicating percent expression and color indicating average expression. **c.** Stacked bar plot showing stromal cluster composition across localized, CRPC prostate, and mCRPC samples. **d.** Heatmap showing hallmark pathway enrichment across stromal clusters (enrichment score; \* = adj  $p < 0.05$ ). **e.** Boxplot showing CAF core matrisome signature scores across localized, CRPC prostate, and mCRPC stromal cells. **f-g.** Dot plots showing Reactome pathway enrichment analysis for differentially expressed genes in CRPC prostate (h) and mCRPC (i) compared to localized samples. **h.** UMAP plot showing clustering results for myeloid populations including CD1C\_Dendritic\_Cells, plasmacytoid dendritic cells, classical monocytes, CD14Neg monocytes, M2 macrophages, SPP1 macrophages, neutrophils, and proliferating myeloid cells. **i.** Compositional analysis of myeloid populations comparing localized prostate cancer and CRPC patients using scomp. Error bars representing credible intervals; populations with FDR below the significance threshold are highlighted.



## Supp Figure 7. T-cell cell subpopulation signatures and analyses

**a.** Dot plot showing expression of marker genes across T-cell subclusters. Dot size represents the percentage of cells expressing each gene, and color intensity indicates average expression. **b.** Patient-level T-cell subtype composition across AFR and EUR patients. Stacked bar plots illustrate relative proportions of T-cell subtypes for each patient. **c.** Gene set enrichment analysis of Th17 T-cell marker genes showing enrichment of IL2–STAT5 signaling, TNF $\alpha$  signaling via NF $\kappa$ B, inflammatory response, apoptosis, and related pathways. **d.** Correlation matrix showing relationships between immune and stromal cell populations across patients. Th17 T-cells positively correlate with multiple T-cell populations and are negatively correlated with stromal components including ECM and activated fibroblasts. **e.** Expression of NF $\kappa$ B-related genes (*TNFAIP3*, *NFKBIZ*, *TRAF3*, *TNIP2*, *NFKBIE*) in Th17 T cells from AFR versus EUR patients, supporting activation of TNF $\alpha$ –NF $\kappa$ B signaling in AFR tumors.



### **Supp Figure 8. Characterization of Schwann cells in Xenium spatial data.**

**a.** Overview of the Xenium 5K platform workflow. Tissue sections were formalin-fixed, paraffin-embedded (FFPE), followed by deparaffinization, probe hybridization, ligation, and rolling circle amplification. H&E and fluorescence images illustrate spatial transcriptomic readout and cell segmentation. **b.** Dot plot of selected marker genes for all major annotated cell types in the EUR sample. **c.** Violin plot and cell count bar plot showing Schwann cell abundance and total cell count. **d.** Annotated H&E image from the EUR sample showing Schwann cell distribution relative to tumor glands, stromal, and vascular compartments. **e.** H&E image illustrating the location of Schwann cells (blue) with satellite glial-like cells (red) and myeloid cells (green) around perineural regions. **f.** GO biological process enrichment for Schwann cell-specific DEGs. **g.** Dot plot showing TGFbeta signaling markers in epithelial cells and Schwann cells in the Xenium data.

Supp Figure 9

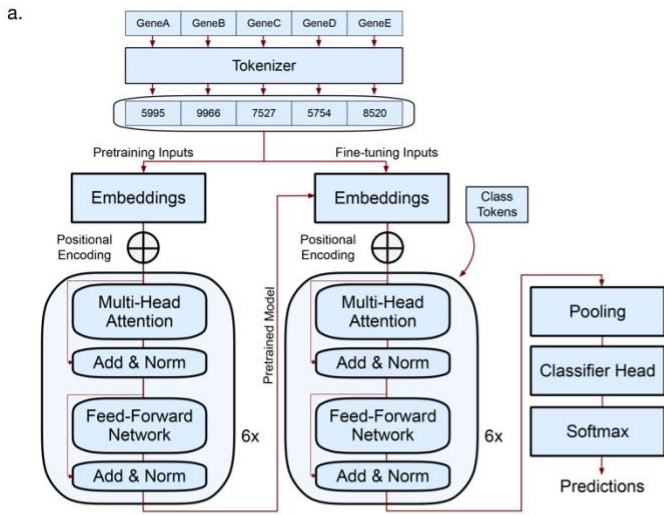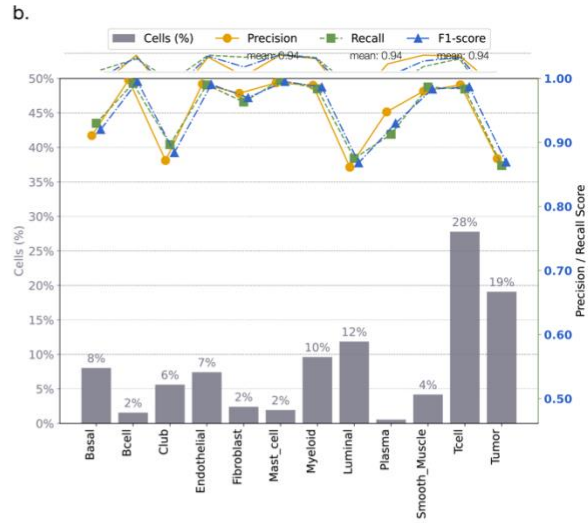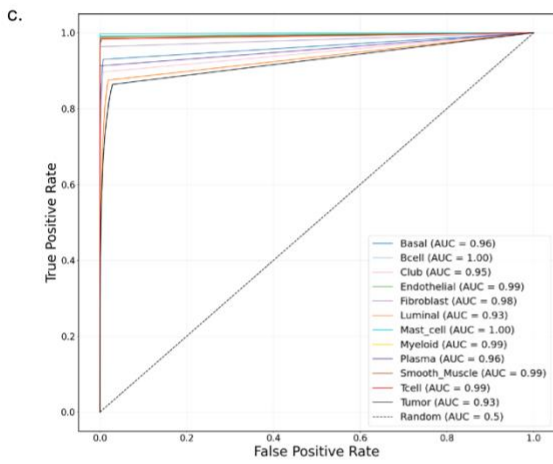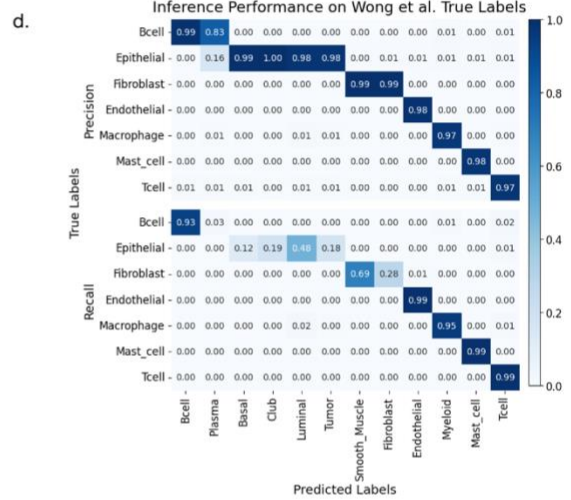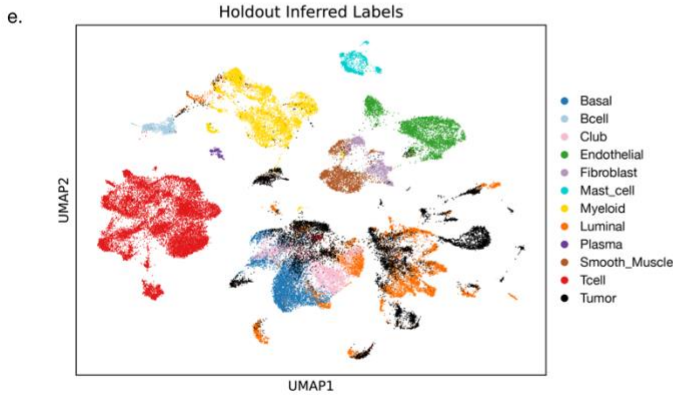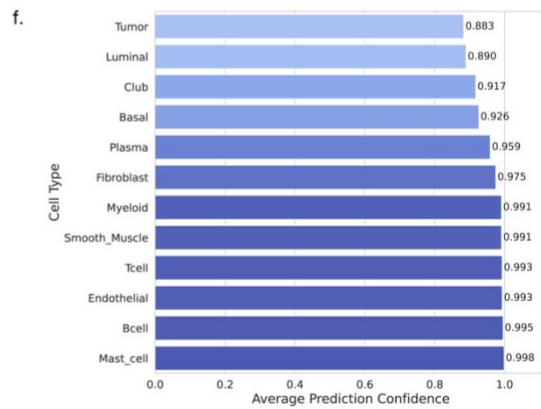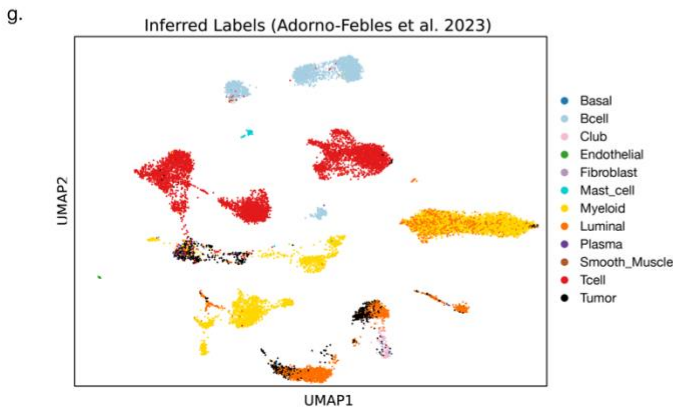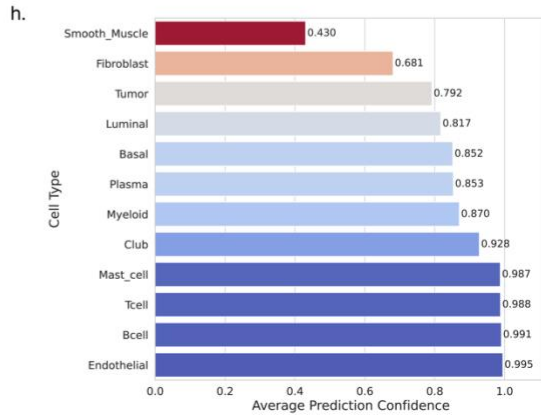

## **Supp Figure 9. Evaluation of transformer model inference performance.**

**a.** Flowchart of the deep learning transformer pipeline from data preprocessing to prediction. **b.** Per-class fine-tune performance: precision, recall, and F1-score are high for most cell types ( $>0.90$ ), with best performance on immune populations (B-cells, mast cells, myeloid cells, plasma cells, T-cells). Misclassifications are most frequent for non-tumor luminal and tumor cells. Orange, green, and blue lines indicate precision, recall, and F1, respectively; gray bars indicate class size. **c.** Receiver operating characteristic (ROC) curves for all predicted Atlas cell types with area under the curve (AUC)  $> 0.90$  across classes. **d.** Model performance on the external Wong et al. scRNA-seq inference dataset, summarized by confusion matrices of precision (top left) and recall (bottom left). **e.** UMAP of predicted cell types in the Atlas hold-out dataset showing well separated clusters corresponding to distinct cell types. **f.** Mean confidence per predicted cell type in the Atlas hold-out dataset. Immune populations are predicted with the highest confidence ( $>0.90$ ), whereas non-tumor luminal and tumor cells show lower averages (mean confidence 0.89 and 0.88, respectively). **g.** UMAP of predicted cell types for the Adorno-Febles et al. inference dataset, demonstrating well separated clusters and cross dataset generalizability. **h.** Mean confidence per predicted cell type on the Adorno-Febles et al. dataset. Confidence remains high for most lineages, with moderate tumor and non-tumor luminal predictions, and lower fibroblast and smooth muscle confidence scores.

### **Supplementary Table 1. Clinical and sample metadata for the prostate cancer cohort**

Clinical metadata for all patients and specimens in the atlas, including patient identifiers, sample origin, and pathological metadata.

### **Supplementary Table 2. Gene modules identified in the prostate cancer single-cell atlas**

Gene modules derived using celda, including module assignments, genes in each module, and biological annotations used for downstream functional and enrichment analyses.

### **Supplementary Table 3. Neuroendocrine prostate cancer (NEPC) signature genes and prediction metrics**

Genes in the two “core” NE modules, their respective scoring metrics and statistical significance used to define NEPC-related transcriptional programs.

### **Supplementary Table 4. Ancestry validation of the 6 AFR PCa patients**

Genetic ancestry inference results for the six self-reported African American prostate cancer patients, including predicted ancestry labels, and probabilities.

### **Supplementary Table 5. Performance evaluation of the PCformer model across datasets**

Evaluation metrics and prediction outputs for the PCformer model, including confusion matrices, classification performance, and comparisons across internal and external validation datasets.
