# Supplementary material for: Defining the combinatorial nature of gene modules in prostate cancer underlying lineage plasticity and metastasis
Source: Research Square preprint supplement (doi:10.21203/rs.3.rs-9430776/v1), 2026-05-11
Supplement: Supplementary file 1 [file 11fa8af2dc47e952dab1f9aa.xlsx]

## Sheet: Atlas_holdout_precision
Supplementary Table 5a. Precision confusion matrix from inference of the fine-tuned PCformer model evaluated on the Atlas hold-out dataset. Rows represent predicted cell types and columns represent true labels. Values are normalized by predicted class totals, corresponding to per-class precision.
	Basal	Bcell	Club	Endothelial	Fibroblast	Mast_cell	Myeloid	Non_Tumor	Plasma	Smooth_Muscle	Tcell	Tumor
Basal	0.910785	0	0.0223143	0	0.000776398	0	0	0.00521299	0	0	0	0.0196413
Bcell	0	0.9978	0	0	0	0.000866551	0	0.000148943	0	0	0.000323227	0
Club	0.0160018	0	0.871852	0.000236239	0	0	0	0.0132559	0.00348432	0	0	0.0143277
Endothelial	0	0	0	0.991259	0	0	0.00018379	0.000148943	0	0.000863185	0.000193936	0.00341588
Fibroblast	0	0	0	0	0.976708	0.000866551	0.000367579	0.000446828	0	0.0129478	0	0.00113863
Mast_cell	0	0	0	0	0	0.993068	0.00018379	0	0	0	6.46e-05	9.49e-05
Myeloid	0	0	0	0	0.0015528	0.00259965	0.98934	0.00431933	0	0.000431593	0.000258582	0.00474428
Non_Tumor	0.00920649	0	0.0414409	0.000708717	0	0	0.00220548	0.861335	0.0278746	0.000431593	0.000905036	0.0583547
Plasma	0.000219202	0	0	0	0	0	0	0.00193625	0.947735	0	0.000193936	0.000853971
Smooth_Muscle	0	0	0	0.000236239	0.0147516	0	0	0	0	0.980147	6.46e-05	0.000948857
Tcell	0	0.00110011	0	0.000472478	0.000776398	0	0.000367579	0.00253202	0.010453	0.00129478	0.990045	0.0216339
Tumor	0.0637878	0.00110011	0.0643927	0.00708717	0.00543478	0.00259965	0.00735159	0.110664	0.010453	0.00388433	0.00795139	0.874846

## Sheet: Atlas_holdout_recall
Supplementary Table 5b. Recall confusion matrix from inference of the fine-tuned PCformer model evaluated on the Atlas hold-out dataset. Rows represent predicted cell types and columns represent true labels. Values are normalized by true class totals, corresponding to per-class recall.
	Basal	Bcell	Club	Endothelial	Fibroblast	Mast_cell	Myeloid	Non_Tumor	Plasma	Smooth_Muscle	Tcell	Tumor
Basal	0.929946	0	0.015667	0	0.000223814	0	0	0.00783348	0	0	0	0.0463295
Bcell	0	0.992341	0	0	0	0.00109409	0	0.00109409	0	0	0.00547046	0
Club	0.0239344	0	0.896721	0.000327869	0	0	0	0.0291803	0.000327869	0	0	0.0495082
Endothelial	0	0	0	0.989856	0	0	0.000235905	0.000235905	0	0.000471809	0.000707714	0.00849257
Fibroblast	0	0	0	0	0.963247	0.000765697	0.00153139	0.00229709	0	0.0229709	0	0.00918836
Mast_cell	0	0	0	0	0	0.997389	0.000870322	0	0	0	0.000870322	0.000870322
Myeloid	0	0	0	0	0.000365497	0.000548246	0.983735	0.00529971	0	0.000182749	0.000730994	0.00913743
Non_Tumor	0.00635593	0	0.0196731	0.000453995	0	0	0.00181598	0.875151	0.00121065	0.000151332	0.00211864	0.093069
Plasma	0.0033557	0	0	0	0	0	0	0.0436242	0.912752	0	0.0100671	0.0302013
Smooth_Muscle	0	0	0	0.000434405	0.00825369	0	0	0	0	0.986533	0.000434405	0.00434405
Tcell	0	6.42e-05	0	0.000128436	6.42e-05	0	0.000128436	0.0010917	0.000192653	0.000192653	0.983496	0.0146417
Tumor	0.0272676	9.37e-05	0.018928	0.00281109	0.000655922	0.000281109	0.00374813	0.0696214	0.000281109	0.000843328	0.0115255	0.863943

## Sheet: Wong_etal_precision
Supplementary Table 5c. Precision confusion matrix from inference of the fine-tuned PCformer model evaluated on the external Wong dataset. Rows represent predicted PCformer cell types and columns represent annotated cell types. Values are normalized by predicted class totals.
	Bcell	Plasma	Endothelial	Basal	Club	Non_Tumor	Tumor	Smooth_Muscle	Fibroblast	Myeloid	Mast_cell	Tcell
Bcell	0.985152	0.827815	0.00028165	0	0.000600601	0.00114548	0.002118	0	0	0.0127338	0.00222222	0.00561698
Endothelial	0.000674916	0	0.98465	0	0	0.000229095	0.00302572	0.000547645	0.0026738	0.000198965	0	0.00118252
Epithelial	0.00337458	0.15894	0.00732291	0.991822	0.996396	0.978351	0.979728	0.00438116	0.00534759	0.0131317	0.00888889	0.013599
Fibroblasts	0.000899888	0	0.00366146	0.00136302	0.000900901	0.000801833	0.00121029	0.993976	0.991979	0.000198965	0.00111111	0.000413883
Macrophage	0.00247469	0.00662252	0.00239403	0.000454339	0.0003003	0.0142039	0.00695915	0.000547645	0	0.96737	0.00333333	0.00449358
Mast_cell	0	0	0.00028165	0.000908678	0	0	0	0	0	0	0.975556	0.000118252
Tcell	0.00742407	0.00662252	0.00140825	0.00545207	0.0018018	0.00526919	0.00695915	0.000547645	0	0.00636689	0.00888889	0.974576

## Sheet: Wong_etal_recall
Supplementary Table 5d. Recall confusion matrix from inference of the fine-tuned PCformer model evaluated on the external Wong dataset. Rows represent predicted PCformer cell types and columns represent annotated cell types. Values are normalized by true class totals.
	Bcell	Plasma	Endothelial	Basal	Club	Non_Tumor	Tumor	Smooth_Muscle	Fibroblast	Myeloid	Mast_cell	Tcell
Bcell	0.934486	0.0266752	0.000426803	0	0.000426803	0.00213402	0.00149381	0	0	0.0136577	0.000426803	0.0202732
Endothelial	0.000426682	0	0.994453	0	0	0.000284455	0.00142227	0.000142227	0.000284455	0.000142227	0	0.00284455
Epithelial	0.000848081	0.00135693	0.00294001	0.123424	0.187595	0.482897	0.183072	0.00045231	0.000226155	0.00373155	0.00045231	0.0130039
Fibroblasts	0.00153081	0	0.00995025	0.00114811	0.00114811	0.00267891	0.00153081	0.694604	0.283965	0.000382702	0.000382702	0.00267891
Macrophage	0.00214844	0.000195313	0.00332031	0.000195313	0.000195313	0.0242188	0.00449219	0.000195313	0	0.949609	0.000585937	0.0148437
Mast_cell	0	0	0.00226244	0.00226244	0	0	0	0	0	0	0.993213	0.00226244
Tcell	0.00198139	6e-05	0.00060042	0.000720504	0.000360252	0.00276193	0.00138097	6e-05	0	0.00192134	0.000480336	0.989673
