# Supplementary material for: Defining the combinatorial nature of gene modules in prostate cancer underlying lineage plasticity and metastasis
Source: Research Square preprint supplement (doi:10.21203/rs.3.rs-9430776/v1), 2026-05-11
Supplement: Supplementary file 2 [file 3d310badf8d8bd3e77bad668.xlsx]

## Sheet: somalier-ancestry.somalier-ance
Supplementary Table 4. Ancestry validation of the 6 AFR PCa patients
sample_id	predicted_ancestry	EAS_prob	AFR_prob	AMR_prob	SAS_prob	EUR_prob	PC1	PC2	PC3	PC4	PC5
PCA2	AFR	0	0.9999	0	0.0001	0	3.1156	1.4621	-0.1324	-0.8163	-0.7434
PRO505	AFR	0	0.9998	0.0002	0	0	3.3397	1.9138	1.2063	-0.6603	-0.3043
VAPROS1	AFR	0	0.9991	0.0006	0.0002	0	2.4556	1.5252	1.3182	-1.3971	-1.0036
PCA3	AFR	0	0.9615	0.016	0.0204	0.0021	1.8583	1.0225	0.8119	-0.3393	-0.3464
PCA6	AFR	0.0001	0.9841	0.0127	0.0028	0.0004	2.2189	1.4841	1.5822	0.6022	0.6083
PR5316	AFR	0	0.9997	0.0003	0	0	2.8869	1.8007	1.4853	0.5945	-1.2492
