# Supplementary material for: Defining the combinatorial nature of gene modules in prostate cancer underlying lineage plasticity and metastasis
Source: Research Square preprint supplement (doi:10.21203/rs.3.rs-9430776/v1), 2026-05-11
Supplement: Supplementary file 3 [file 7b4ed944c107425b6610d78e.xlsx]

## Sheet: clinical
Supplementary Table 1. Clinical and sample metadata for the prostate cancer cohort
Batch	Unique_Patient	Age	Tumor Stage	Tissue	Gleason Score	Gleason_1st	Gleason_2nd	Treatment	Tissue Dissociation Step(Kit/Enzyme name)	Assay type: 10X 3prime, 10X 5prime, Smartseq, Indrop......	Histology type	self reported race/ethnicity	Clinical Outcome	Age_group	Is_treated	Gleason_Class
Chen_etal	JD1800155SL	61	T3aN0M0	Prostate	4+5	4	5	NO	Miltenyi	10X Single Cell 3’ v2	AdenoCa				NO	High
Chen_etal	JD1800162SL	61	T2cN1M0	Prostate	4+3	4	3	NO	Miltenyi	10X Single Cell 3’ v2	AdenoCa				NO	Low
Chen_etal	JD1800177SL	68	T2bN0M1a	Prostate	4+5	4	5	NO	Miltenyi	10X Single Cell 3’ v2	AdenoCa				NO	High
Chen_etal	JD1800176SL	71	T3aN0M0	Prostate	4+3	4	3	NO	Miltenyi	10X Single Cell 3’ v2	AdenoCa				Yes	Low
Chen_etal	JD1800156SL	72	T3aN0M0	Prostate	4+5	4	5	NO	Miltenyi	10X Single Cell 3’ v2	AdenoCa				NO	High
Chen_etal	JD1800175SL	72	T3aN0M1b	Prostate	4+5	4	5	NO	Miltenyi	10X Single Cell 3’ v2	AdenoCa				NO	High
Chen_etal	JD1800154SL	75	T4N0M0	Prostate	5+5	5	5	NO	Miltenyi	10X Single Cell 3’ v2	AdenoCa				NO	High
Chen_etal	JD1800174SL	76	T2cN0M0	Prostate	3+4	3	4	NO	Miltenyi	10X Single Cell 3’ v2	AdenoCa				NO	Low
Chen_etal	JD1800159SL	77	T2cN0M0	Prostate	4+3	4	3	NO	Miltenyi	10X Single Cell 3’ v2	AdenoCa				NO	Low
Chen_etal	JD1800171SL	79	T2cN1M1b	Prostate	4+5	4	5	NO	Miltenyi	10X Single Cell 3’ v2	AdenoCa				NO	High
Chen_etal	JD1800172SL	79	T2cN1M1b	Prostate	4+5	4	5	NO	Miltenyi	10X Single Cell 3’ v2	AdenoCa				NO	High
Chen_etal	JD1800173SL	80	T2cN0M0	Prostate	4+5	4	5	ADT	Miltenyi	10X Single Cell 3’ v2	AdenoCa				Yes	High
Chen_etal	JD1800153SL	81	T4N1M0	Prostate	4+5	4	5	NO	Miltenyi	10X Single Cell 3’ v2	AdenoCa				NO	High
Chen_FW	HMP04			Liver metastasis				Bicalutamide, Lupron, Enzalutamide, Abiraterone/Cabazitaxel, Carboplatin/Etoposide	collagenase type II	10X Single Cell 3’ v3	NEPC				Yes
Chen_FW	HMP05			Liver metastasis				Bicalutamide, Degarelix, Abiraterone	collagenase type II	10X Single Cell 3’ v3	mCRPC				Yes
Chen_FW	HMP08			Mediastinal mass				Degarelix, Enzalutamide, Darolutamide	collagenase type II	10X Single Cell 3’ v3	mCRPC				Yes
Chen_FW	HMP11			Brain and epidural metastasis				Lupron, Abiraterone, Enzalutamide, Radium-223, Docetaxel, Cabazitaxel, Carboplatin	collagenase type II	10X Single Cell 3’ v3	mCRPC				Yes
Chen_FW	HMP13			Supraclavicular lymph node				Lupron, Bicalutamide, Enzalutamide, Abiraterone/Cabazitaxel, Ipilumimab/Nivolumab	collagenase type II	10X Single Cell 3’ v3	mCRPC				Yes
Chen_FW	HMP14B			Left posteriormedial external lymph node				Lupron, Docetaxel	collagenase type II	10X Single Cell 3’ v3	mCRPC				Yes
Chen_FW	HMP15									10X Single Cell 3’ v3	mCRPC				Yes
Chen_FW	HMP16			Liver metastasis				Bicalutamide, Lupron, Abiraterone, Radium-223, Enzalutamide, Docetaxel/Carboplatin	collagenase type II	10X Single Cell 3’ v3	mCRPC				Yes
Chen_FW	HMP17			Left retrocrural abdomen mass				Degarelix, Bicalutamide, Lu-177 PSMA, Enzalutamide	collagenase type II	10X Single Cell 3’ v3	mCRPC				Yes
Chen_FW	HMP19			Para-aortic lymph node				Nilandron, Ketoconazole, Lupron, Abiraterone/Cabazitaxel, Enzalutamide	collagenase type II	10X Single Cell 3’ v3	mCRPC				Yes
Chen_FW	HMP20			Pelvic LN				Lupron, Abiraterone	collagenase type II	10X Single Cell 3’ v3	mCRPC				Yes
Chen_FW	HMP25			Liver				Degarelix, Casodex, Carboplatin, Docetaxel	collagenase type II	10X Single Cell 3’ v3	mCRPC				Yes
Chen_FW	HMP26			Liver				Lupron, Exanlutamide, Docetaxel, Carboplatin	collagenase type II	10X Single Cell 3’ v3	mCRPC				Yes
Ci_etal	P5	58	T3a	Prostate	4+3	4	3	No		10X	AdenoCa				No	Low
Ci_etal	P8	58	T2c	Prostate	4+5	4	5	No		10X	AdenoCa				No	High
Ci_etal	P1	64	T3b	Prostate	4+5	4	5	No		10X	AdenoCa				No	High
Ci_etal	P11	64	T2c	Prostate	3+4	3	4	No		10X	AdenoCa				No	Low
Ci_etal	P3	65	T3b	Prostate	4+5	4	5	No		10X	AdenoCa				No	High
Ci_etal	P6	66	T2c	Prostate	4+3	4	3	No		10X	AdenoCa				No	Low
Ci_etal	P2	67	T3a	Prostate	3+4	3	4	No		10X	AdenoCa				No	Low
Ci_etal	P10	67	T2c	Prostate	3+4	3	4	No		10X	AdenoCa				No	Low
Ci_etal	P14	71	T2c	Prostate	3+4	3	4	No		10X	AdenoCa				NO	Low
Ci_etal	P7	72	T3a	Prostate	4+5	4	5	No		10X	AdenoCa				No	High
Ci_etal	P4	74	T3b	Prostate	4+3	4	3	No		10X	AdenoCa				No	Low
Ci_etal	P9	76	T2a	Prostate	3+3	3	3	No		10X	AdenoCa				No	Low
Ci_etal	P12	76	T2c	Prostate	3+4	3	4	No		10X	AdenoCa				No	Low
Ci_etal	P13	82	T2c	Prostate	3+5	3	5	No		10X	AdenoCa				No	High
Dong_etal	GSM4711414_P5	65	cT4N1M1	Prostate	4+4	4	4	Bilateral orchidectomy, bicalutamide	collagenase IV, DNase I		AdenoCa				Yes	Low
Dong_etal	GSM4711415_P6	70	cT3bN0M1	Prostate				Docetaxel	collagenase IV, DNase I		NEPC				Yes	High
Dong_etal	GSM4089154_P4	78	cT4N0M1	Prostate	4+3	4	3	Bilateral orchidectomy, bicalutamide	collagenase IV, DNase I		AdenoCa				Yes	Low
Dong_etal	GSM4089151_P1	82	cT4N0M0	Prostate	4+5	4	5	Goserelin, bicalutamide	collagenase IV, DNase I		AdenoCa				Yes	High
Dong_etal	GSM4089152_P2	82	cT3bN0M0	Prostate	4+3	4	3	Goserelin, bicalutamide	collagenase IV, DNase I		AdenoCa				Yes	Low
Dong_etal	GSM4089153_P3	86	cT2cN0M0	Prostate	4+4	4	4	Goserelin, bicalutamide	collagenase IV, DNase I		AdenoCa				Yes	Low
Heidegger_etal	GSM5793826_P3	61	pT3a	Prostate					FACS isolated	Single Cell 3' Kit v3.1	AdenoCa
Heidegger_etal	GSM5793825_P2	63	pT2a	Prostate					FACS isolated	Single Cell 3' Kit v3.1	AdenoCa
Heidegger_etal	GSM5793827_P4	72	pT3b	Prostate					FACS isolated	Single Cell 3' Kit v3.1	AdenoCa
Heidegger_etal	GSM5793824_P1	73	pT2c	Prostate					FACS isolated	Single Cell 3' Kit v3.1	AdenoCa
Hirz_etal	SCG-PCA22-N-HG	63	pT3b N0	Prostate	4+5	4	5		Collagenase I, Collagenase II, Collagenase III, Collagenase IV, Dispase	10X Single Cell 3’ v2	AdenoCa	Hispanic				High
Hirz_etal	SCG-PCA22-T-HG	63	pT3b N0	Prostate	4+5	4	5		Collagenase I, Collagenase II, Collagenase III, Collagenase IV, Dispase	10X Single Cell 3’ v2	AdenoCa	Hispanic				High
Hirz_etal	SCG-PCA10-T-LG	46	pT3a	Prostate	3+3	3	3		Collagenase I, Collagenase II, Collagenase III, Collagenase IV, Dispase	10X Single Cell 3’ v2	AdenoCa	White				Low
Hirz_etal	SCG-PCA7-T-HG	53	pT3b N1	Prostate	5+5	5	5		Collagenase I, Collagenase II, Collagenase III, Collagenase IV, Dispase	10X Single Cell 3’ v2	AdenoCa	White				High
Hirz_etal	SCG-PCA12	54	pT2 N0	Prostate	3+3	3	3		Collagenase I, Collagenase II, Collagenase III, Collagenase IV, Dispase	10X Single Cell 3’ v2	AdenoCa	White				Low
Hirz_etal	SCG-PCA6-N-HG	57	pT3a	Prostate	3+5	3	5		Collagenase I, Collagenase II, Collagenase III, Collagenase IV, Dispase	10X Single Cell 3’ v2	AdenoCa	White				High
Hirz_etal	SCG-PCA6-T-HG	57	pT3a	Prostate	3+5	3	5		Collagenase I, Collagenase II, Collagenase III, Collagenase IV, Dispase	10X Single Cell 3’ v2	AdenoCa	White				High
Hirz_etal	SCG-PCA18	59	pT2 N0	Prostate	3+3	3	3		Collagenase I, Collagenase II, Collagenase III, Collagenase IV, Dispase	10X Single Cell 3’ v2	AdenoCa	White				Low
Hirz_etal	SCG-PCA19-N-HG	59	pT3b N1	Prostate	5+3	5	3		Collagenase I, Collagenase II, Collagenase III, Collagenase IV, Dispase	10X Single Cell 3’ v2	AdenoCa	White				High
Hirz_etal	SCG-PCA19-T-HG	59	pT3b N1	Prostate	5+3	5	3		Collagenase I, Collagenase II, Collagenase III, Collagenase IV, Dispase	10X Single Cell 3’ v2	AdenoCa	White				High
Hirz_etal	SCG-PCA16-T-HG	61	pT3a N1	Prostate	4+5	4	5		Collagenase I, Collagenase II, Collagenase III, Collagenase IV, Dispase	10X Single Cell 3’ v2	AdenoCa	White				High
Hirz_etal	SCG-PCA20	61	pT2 Nx	Prostate	3+4	3	4		Collagenase I, Collagenase II, Collagenase III, Collagenase IV, Dispase	10X Single Cell 3’ v2	AdenoCa	White				Low
Hirz_etal	SCG-PCA17	65	pT2 N0	Prostate	3+3	3	3		Collagenase I, Collagenase II, Collagenase III, Collagenase IV, Dispase	10X Single Cell 3’ v2	AdenoCa	White				Low
Hirz_etal	SCG-PCA9	65	pT2c	Prostate	4+3	4	3		Collagenase I, Collagenase II, Collagenase III, Collagenase IV, Dispase	10X Single Cell 3’ v2	AdenoCa	White				Low
Hirz_etal	SCG-PCA8-T-HG	66	pT2c	Prostate	4+4	4	4		Collagenase I, Collagenase II, Collagenase III, Collagenase IV, Dispase	10X Single Cell 3’ v2	AdenoCa	White				Low
Hirz_etal	SCG-PCA5	68	pT3a	Prostate	4+3	4	3		Collagenase I, Collagenase II, Collagenase III, Collagenase IV, Dispase	10X Single Cell 3’ v2	AdenoCa	White				Low
Hirz_etal	SCG-PCA3	69	pT2a	Prostate	3+4	3	4		Collagenase I, Collagenase II, Collagenase III, Collagenase IV, Dispase	10X Single Cell 3’ v2	AdenoCa	White				Low
Hirz_etal	SCG-PCA11	71	pT2c	Prostate	3+4	3	4		Collagenase I, Collagenase II, Collagenase III, Collagenase IV, Dispase	10X Single Cell 3’ v2	AdenoCa	White				Low
Hirz_etal	SCG-PCA15-N-HG	71	pT2 N0	Prostate	3+4	3	4		Collagenase I, Collagenase II, Collagenase III, Collagenase IV, Dispase	10X Single Cell 3’ v2	AdenoCa	White				Low
Hirz_etal	SCG-PCA15-T-HG	71	pT2 N0	Prostate	3+4	3	4		Collagenase I, Collagenase II, Collagenase III, Collagenase IV, Dispase	10X Single Cell 3’ v2	AdenoCa	White				Low
Hirz_etal	SCG-PCA4-N-HG	71	pT3a	Prostate	4+5	4	5		Collagenase I, Collagenase II, Collagenase III, Collagenase IV, Dispase	10X Single Cell 3’ v2	AdenoCa	White				High
Hirz_etal	SCG-PCA4-T-HG	71	pT3a	Prostate	4+5	4	5		Collagenase I, Collagenase II, Collagenase III, Collagenase IV, Dispase	10X Single Cell 3’ v2	AdenoCa	White				High
Hirz_etal	SCG-PCA21	73	pT3a N0	Prostate	3+4	3	4		Collagenase I, Collagenase II, Collagenase III, Collagenase IV, Dispase	10X Single Cell 3’ v2	AdenoCa	White				Low
Huang_etal	CRPC2	58	pT3N1M1	Prostate	5+5	5	5	bicalutamide Abiraterone	FACS isolated	10X Single Cell 3’ v2	NEPC				Yes	High
Huang_etal	Cheng_PCa3	61	pT2N0M0	Prostate	4+3	4	3	No	FACS isolated	10X Single Cell 3’ v2	AdenoCa				No	Low
Huang_etal	Cheng_PCa2	63	pT2N0M0	Prostate	4+3	4	3	No	FACS isolated	10X Single Cell 3’ v2	AdenoCa				No	Low
Huang_etal	PCa2_benign_CD49H	63	pT2N0M0	Prostate	4+3	4	3	No	FACS isolated	10X Single Cell 3’ v2	AdenoCa				No	Low
Huang_etal	CRPC1	66	pT3N1M1	Prostate	4+4	4	4	Leuprolide acetate	FACS isolated	10X Single Cell 3’ v2	CRPC				Yes	Low
Huang_etal	Cheng_PCa1	66	pT2N0M0	Prostate	4+3	4	3	No	FACS isolated	10X Single Cell 3’ v2	AdenoCa				No	Low
Huang_etal	CRPC3	71	pT3N1M1	Prostate	4+3	4	3	prednisone Leuprolide acetate	FACS isolated	10X Single Cell 3’ v2	CRPC				No	Low
Karthaus_etal	HP100			Prostate				ADT	Collagenase Type II	10X Single Cell 3’ v2	AdenoCa				Yes
Karthaus_etal	HP101			Prostate				ADT	Collagenase Type II	10X Single Cell 3’ v2	AdenoCa				Yes
Karthaus_etal	HP103			Prostate				ADT	Collagenase Type II	10X Single Cell 3’ v2	AdenoCa				Yes
Karthaus_etal	HP95			Prostate				ADT	Collagenase Type II	10X Single Cell 3’ v2	AdenoCa				Yes
Karthaus_etal	HP96			Prostate				ADT	Collagenase Type II	10X Single Cell 3’ v2	AdenoCa				Yes
Karthaus_etal	HP97			Prostate				ADT	Collagenase Type II	10X Single Cell 3’ v2	AdenoCa				Yes
Karthaus_etal	HP98			Prostate				ADT	Collagenase Type II	10X Single Cell 3’ v2	AdenoCa				Yes
Karthaus_etal	HP99			Prostate				ADT	Collagenase Type II	10X Single Cell 3’ v2	AdenoCa				Yes	Low
Kfoury_etal	BMET_10	65	Metastasis	Bone Marrow	4+5	4	5	GnRH agonist, abiraterone (39 mo), radium-223	Collagenase I, Collagenase II, Collagenase III, Collagenase IV, Dispase	10X Single Cell 3’ v2	mCRPC				Yes	High
Kfoury_etal	BMET_11	68	Metastasis	Bone Marrow	5+5	5	5	GnRH agonist, docetaxel (6 cycles), abiraterone (5 mo), radium-223, pembrolizumab (deficient mismatch repair by IHC)	Collagenase I, Collagenase II, Collagenase III, Collagenase IV, Dispase	10X Single Cell 3’ v2	mCRPC				Yes
Kfoury_etal	BMET_2	68	Metastasis	Bone Marrow				2 days bicalutamide (antiandrogen; newly-initiated therapy)	Collagenase I, Collagenase II, Collagenase III, Collagenase IV, Dispase	10X Single Cell 3’ v2	mCRPC				Yes	High
Kfoury_etal	BMET_6	69	Metastasis	Bone Marrow	4+3	4	3	GnRH agonist, abiraterone (17 mo), docetaxel (4 cycles)	Collagenase I, Collagenase II, Collagenase III, Collagenase IV, Dispase	10X Single Cell 3’ v2	mCRPC				Yes	Low
Kfoury_etal	BMET_1	73	Metastasis	Bone Marrow	3+3	3	3	GnRH agonist, abiraterone (9 months), docetaxel (5 cycles)	Collagenase I, Collagenase II, Collagenase III, Collagenase IV, Dispase	10X Single Cell 3’ v2	mCRPC				Yes	High
Kfoury_etal	BMET_3	73	Metastasis	Bone Marrow	4+5	4	5	GnRH agonist (ongoing PSA response)	Collagenase I, Collagenase II, Collagenase III, Collagenase IV, Dispase	10X Single Cell 3’ v2	mCRPC				Yes	Low
Kfoury_etal	BMET_8	74	Metastasis	Bone Marrow	3+4	3	4	GnRH agonist, abiraterone (9 mo; ongoing PSA response)	Collagenase I, Collagenase II, Collagenase III, Collagenase IV, Dispase	10X Single Cell 3’ v2	mCRPC				Yes	Low
Kfoury_etal	BMET_5	78	Metastasis	Bone Marrow	4+3	4	3	GnRH agonist, abiraterone (3 months)	Collagenase I, Collagenase II, Collagenase III, Collagenase IV, Dispase	10X Single Cell 3’ v2	mCRPC				Yes	Low
Kfoury_etal	BMET_7	81	Metastasis	Bone Marrow	3+4	3	4	GnRH agonist (ongoing PSA response)	Collagenase I, Collagenase II, Collagenase III, Collagenase IV, Dispase	10X Single Cell 3’ v2	mCRPC				Yes	Low
Ma_etal	Ma_GSM4773521_PCa1			Prostate	3+3	3	3	No	collagenase/hyaluronidase/dispase	10X Single Cell 3’ v2	AdenoCa				No	Low
Ma_etal	Ma_GSM4773522_PCa2			Prostate	3+4	3	4	No	collagenase/hyaluronidase/dispase	10X Single Cell 3’ v2	AdenoCa				No	Low
Met_Liver	PSMA_Liver		Metastasis	Liver						10X	mCRPC
Met_Sphenoid	M_P3A		Metastasis	Sphenoid						10X	mCRPC
Seqwell	PR5316	48		Prostate	3+4	3	4			Seqwell	AdenoCa	African American
Seqwell	PROS505	73		Prostate	4+5	4	5			Seqwell	AdenoCa	African American
Seqwell	PCA6	84		Prostate	4+5	4	5			Seqwell	AdenoCa	African American
Seqwell	PCA2			Prostate	3+4	3	4			Seqwell	AdenoCa	African American
Seqwell	PCA3			Prostate	3+4	3	4			Seqwell	AdenoCa	African American
Seqwell	VAPROS1			Prostate	3+4	3	4			Seqwell	AdenoCa	African American
Seqwell	PR5251	55	pT2Nx	Prostate	3+4	3	4			Seqwell	AdenoCa	White
Seqwell	AUG_PB1	58	T1c	Prostate	3+3	3	3			Seqwell	AdenoCa	White
Seqwell	PR5199	61	pT3bN0	Prostate	4+3	4	3			Seqwell	AdenoCa	White
Seqwell	PR5254	62	pT3aN0	Prostate	4+3	4	3			Seqwell	AdenoCa	White
Seqwell	PR5261	66	pT3aNx	Prostate	3+4	3	4			Seqwell	AdenoCa	White
Seqwell	PR5186	72	pT3aN0	Prostate	4+5	4	5			Seqwell	AdenoCa	White
Seqwell	MAY_PB1	78	T2A	Prostate	3+4	3	4			Seqwell	AdenoCa	White
Seqwell	PR5196	70	pT3aN0	Prostate	3+4	3	4			Seqwell	AdenoCa	White
Seqwell	PR5249	75	pT3bNx	Prostate	3+4	3	4			Seqwell	AdenoCa	White
Seqwell	PR5269	75	pT3bNx	Prostate	3+4	3	4			Seqwell	AdenoCa	White
Tuong_etal	D14	50		Prostate	4+3	4	3	NO	Liberase TM	10X Single Cell 3’ v2	AdenoCa				NO	Low
Tuong_etal	D4	58		Prostate	3+4	3	4	NO	Liberase TM	10X Single Cell 3’ v2	AdenoCa				NO	Low
Tuong_etal	D13	64		Prostate	3+3	3	3	NO	Liberase TM	10X Single Cell 3’ v2	AdenoCa				NO	Low
Tuong_etal	D12	67		Prostate	3+4	3	4	NO	Liberase TM	10X Single Cell 3’ v2	AdenoCa				NO	Low
Tuong_etal	D15	67		Prostate	4+3	4	3	NO	Liberase TM	10X Single Cell 3’ v2	AdenoCa				NO	Low
Tuong_etal	D11	68		Prostate	3+3	3	3	NO	Liberase TM	10X Single Cell 3’ v2	AdenoCa				NO	Low
Tuong_etal	D9	70		Prostate	3+3	3	3	NO	Liberase TM	10X Single Cell 3’ v2	AdenoCa				NO	Low
Tuong_etal	D5	71		Prostate	3+4	3	4	NO	Liberase TM	10X Single Cell 3’ v2	AdenoCa				NO	Low
Tuong_etal	D6	72		Prostate	3+4	3	4	NO	Liberase TM	10X Single Cell 3’ v2	AdenoCa				NO	Low
Tuong_etal	D7	74		Prostate	5+4	5	4	NO	Liberase TM	10X Single Cell 3’ v2	AdenoCa				NO	High
