# Supplementary material for: Defining the combinatorial nature of gene modules in prostate cancer underlying lineage plasticity and metastasis
Source: Research Square preprint supplement (doi:10.21203/rs.3.rs-9430776/v1), 2026-05-11
Supplement: Supplementary file 4 [file cd16822e03c0c9e15c35f32e.xlsx]

## Sheet: AUC_DF_Core_NE
Supplementary Table 3. Neuroendocrine prostate cancer (NEPC) signature genes and prediction metrics
Gene	AUC	p_value	MCC	PR_AUC	F1	adj_p	Pass
BEX1	0.599814	0	0.190383	0.11327	0.233858	0	Fail
TNNT1	0.71992	0	0.40516	0.306646	0.437081	0	Fail
TMEM176B	0.614196	0	0.217628	0.156115	0.25924	0	Fail
CGA	0.588647	0	0.372917	0.229457	0.294571	0	Fail
MT3	0.598244	0	0.24615	0.152138	0.26844	0	Fail
OLFM1	0.562961	0	0.126509	0.0813595	0.171491	0	Fail
CDH2	0.577576	0	0.173966	0.106276	0.209895	0	Fail
CHN2	0.676242	0	0.371051	0.231744	0.400881	0	Fail
ELAVL3	0.666432	0	0.45406	0.250194	0.450455	0	Fail
CRMP1	0.691435	0	0.442176	0.306674	0.460816	0	Fail
LINC00926	0.696541	0	0.44561	0.28901	0.466155	0	Fail
FRMD3	0.621064	0	0.312064	0.180798	0.326917	0	Fail
ANK2	0.623006	0	0.299792	0.176569	0.321553	0	Fail
SNCAIP	0.620904	0	0.323709	0.174191	0.333333	0	Fail
CAMK2N2	0.656288	0	0.356626	0.210671	0.38217	0	Fail
TKTL1	0.584018	0	0.314871	0.189378	0.272109	0	Fail
TOX	0.592092	0	0.246438	0.163994	0.26188	0	Fail
PGAM2	0.614415	0	0.373118	0.241047	0.345349	0	Fail
SRRM3	0.62782	0	0.32298	0.186183	0.339462	0	Fail
LINC00958	0.560739	0	0.180976	0.0992017	0.191815	0	Fail
NFATC4	0.5661	0	0.189473	0.117305	0.202731	0	Fail
CPT1C	0.588459	0	0.263504	0.176412	0.263994	0	Fail
IGSF21	0.563775	0	0.183025	0.104526	0.197225	0	Fail
RUNX1T1	0.599424	0	0.328401	0.165679	0.30587	0	Fail
MFAP4	0.504414	5.99e-12	0.0211314	0.0542217	0.0293346	5.99e-12	Fail
TMEM255B	0.602863	0	0.298751	0.1842	0.299096	0	Fail
POMC	0.529528	0	0.121395	0.0755867	0.110523	0	Fail
MAP1A	0.579732	0	0.234572	0.122918	0.240847	0	Fail
DNM1	0.571338	0	0.200349	0.106622	0.215544	0	Fail
STK33	0.593225	0	0.26586	0.153536	0.272182	0	Fail
NEURL1	0.622405	0	0.370909	0.206075	0.357179	0	Fail
ELAVL4	0.630081	0	0.422156	0.239147	0.388867	0	Fail
KIF19	0.562851	0	0.244561	0.151425	0.210632	0	Fail
PLD5	0.568215	0	0.253281	0.142117	0.224668	0	Fail
SV2A	0.545054	0	0.127554	0.0790093	0.149011	0	Fail
ASXL3	0.609912	0	0.346227	0.193769	0.328788	0	Fail
SCN2A	0.609969	0	0.325589	0.187764	0.320431	0	Fail
DENND2A	0.582021	0	0.269023	0.140423	0.256206	0	Fail
RUNDC3A	0.600816	0	0.287449	0.171055	0.291554	0	Fail
PGR	0.566396	0	0.258863	0.13124	0.221998	0	Fail
FMO3	0.555286	0	0.259314	0.134728	0.193945	0	Fail
ACTN2	0.549854	0	0.196174	0.111296	0.17185	0	Fail
UBE2QL1	0.580014	0	0.291194	0.149258	0.258524	0	Fail
SYT5	0.591002	0	0.362199	0.217441	0.297792	0	Fail
MAP4K1	0.550058	0	0.19	0.104648	0.171534	0	Fail
JAKMIP2	0.557722	0	0.184955	0.0977597	0.187647	0	Fail
RAB39A	0.558136	0	0.212735	0.115146	0.194281	0	Fail
KCNH3	0.59002	0	0.337529	0.209904	0.289847	0	Fail
CHST8	0.562706	0	0.237633	0.119419	0.209643	0	Fail
CNRIP1	0.542652	0	0.172607	0.0919883	0.150789	0	Fail
REEP2	0.555816	0	0.219588	0.115102	0.190201	0	Fail
FSD1	0.535299	0	0.146161	0.0817189	0.128481	0	Fail
CPA5	0.557772	0	0.302879	0.164301	0.204974	0	Fail
RAB3C	0.549467	0	0.220426	0.10302	0.174373	0	Fail
GPR162	0.536583	0	0.170628	0.092629	0.133477	0	Fail
RAB33A	0.536099	0	0.159759	0.0870036	0.131543	0	Fail
PTPRN	0.543435	0	0.217804	0.116903	0.156617	0	Fail
SYNGR3	0.561401	0	0.282267	0.152244	0.212954	0	Fail
POU2AF1	0.541574	0	0.185338	0.0942087	0.149078	0	Fail
DUSP26	0.526196	0	0.118884	0.074465	0.100076	0	Fail
CNTN1	0.543114	0	0.219143	0.107579	0.155877	0	Fail
FTCD	0.53096	0	0.148017	0.0808082	0.115557	0	Fail
CCDC178	0.556692	0	0.284425	0.138482	0.200438	0	Fail
POU6F2	0.530591	0	0.151498	0.0808106	0.114509	0	Fail
FAR2	0.528953	0	0.14604	0.0793653	0.109125	0	Fail
ADCY5	0.567885	0	0.264581	0.152109	0.226002	0	Fail
TMEM108	0.528195	0	0.137888	0.081832	0.106409	0	Fail
NRXN2	0.526044	0	0.129117	0.0744657	0.099563	0	Fail
SEZ6L	0.521264	0	0.121135	0.0698049	0.0832527	0	Fail
MYT1L	0.527013	0	0.147751	0.0793321	0.102687	0	Fail
ILDR2	0.530549	0	0.19187	0.0958981	0.114822	0	Fail
WSCD1	0.520356	0	0.124777	0.0762456	0.0796069	0	Fail
ZNF488	0.543398	0	0.241978	0.113357	0.158072	0	Fail
CCM2L	0.519109	0	0.117328	0.0721167	0.0753604	0	Fail
ZNF492	0.513135	4.03e-180	0.0876585	0.0624356	0.0541618	4.17e-180	Fail
BHLHE22	0.517868	0	0.142644	0.0781701	0.0697991	0	Fail
CHRNA1	0.502895	1.4e-12	0.0216841	0.0537244	0.0168919	1.41e-12	Fail
RNF175	0.516614	1.68e-280	0.10949	0.0686946	0.066335	1.76e-280	Fail
ZNF676	0.514753	6.77e-256	0.104534	0.066995	0.0593561	7.06e-256	Fail
LINC00944	0.517508	0	0.140361	0.0788578	0.0684722	0	Fail
MEOX2	0.518126	0	0.163187	0.0857065	0.0703085	0	Fail
KCNK10	0.515935	0	0.149009	0.0800371	0.0622407	0	Fail
BCL6B	0.506064	4.52e-53	0.0468529	0.0573496	0.0278155	4.62e-53	Fail
KLHDC8A	0.50455	4e-49	0.0450699	0.0557494	0.0204932	4.06e-49	Fail
CHIT1	0.506904	1.77e-85	0.0598377	0.0607655	0.0298815	1.82e-85	Fail
IGFBP2	0.92783	0	0.272084	0.559933	0.225877	0	Fail
FOXD1	0.747627	0	0.468012	0.29415	0.496338	0	Fail
SYP	0.716775	0	0.406842	0.26094	0.438622	0	Fail
HOXD8	0.724088	0	0.431586	0.299938	0.461673	0	Fail
FAM178B	0.701358	0	0.470103	0.283607	0.486815	0	Fail
TRIM9	0.695256	0	0.476084	0.336843	0.486587	0	Fail
MAL	0.640655	0	0.358568	0.206036	0.371632	0	Fail
LINC01116	0.657207	0	0.344385	0.169162	0.37392	0	Fail
ENPP2	0.641318	0	0.372856	0.189839	0.381051	0	Fail
KISS1R	0.591153	0	0.310116	0.180094	0.284902	0	Fail
NCAM1	0.648997	0	0.411987	0.226291	0.409552	0	Fail
NPAS3	0.642124	0	0.343954	0.19477	0.363951	0	Fail
PCSK1	0.662238	0	0.440541	0.318993	0.437307	0	Fail
SNAP25	0.673306	0	0.484237	0.349364	0.472363	0	Fail
CCR10	0.649226	0	0.416386	0.28015	0.41119	0	Fail
LMO3	0.636499	0	0.389147	0.272182	0.382702	0	Fail
STXBP5L	0.592507	0	0.267457	0.144103	0.272189	0	Fail
CALCRL	0.619221	0	0.35756	0.200884	0.346916	0	Fail
SLC16A8	0.628747	0	0.458512	0.277652	0.398727	0	Fail
EFR3B	0.644106	0	0.410354	0.255699	0.40254	0	Fail
NRIP3	0.590264	0	0.275596	0.147405	0.27209	0	Fail
ASGR2	0.622002	0	0.427371	0.257311	0.376768	0	Fail
KCNMB2	0.649484	0	0.438981	0.233204	0.42364	0	Fail
HOXB4	0.583897	0	0.278539	0.150868	0.262299	0	Fail
ADAMTS7	0.600867	0	0.374941	0.232639	0.321424	0	Fail
ATG9B	0.574436	0	0.247148	0.140286	0.235515	0	Fail
SIGLEC15	0.59168	0	0.389745	0.215463	0.30506	0	Fail
FAM81B	0.567168	0	0.259407	0.14015	0.223594	0	Fail
MORN5	0.562606	0	0.240671	0.113843	0.21021	0	Fail
MMP16	0.589547	0	0.369884	0.203565	0.296318	0	Fail
AGMO	0.596905	0	0.372407	0.19174	0.313305	0	Fail
HIF3A	0.564826	0	0.285265	0.139794	0.222523	0	Fail
UNC13A	0.581205	0	0.272105	0.179657	0.254781	0	Fail
SPTB	0.569433	0	0.263994	0.15107	0.229387	0	Fail
F2RL3	0.534669	0	0.138552	0.0874448	0.125801	0	Fail
CCDC154	0.563312	0	0.281769	0.144323	0.217989	0	Fail
GRIN2C	0.567506	0	0.307581	0.168152	0.232176	0	Fail
MLIP	0.548386	0	0.244311	0.119213	0.173176	0	Fail
FOLR2	0.555967	0	0.250955	0.127106	0.194878	0	Fail
TMCC2	0.541943	0	0.211968	0.106909	0.151891	0	Fail
CABP7	0.553182	0	0.282619	0.143808	0.190052	0	Fail
FGF14	0.527822	0	0.199263	0.0938474	0.105458	0	Fail
IGFN1	0.512464	0	0.130187	0.0758359	0.0491632	0	Fail
HES6	0.899515	0	0.528979	0.438019	0.514338	0	Pass
PEG10	0.923397	0	0.584291	0.609177	0.573337	0	Pass
TMEM176A	0.768112	0	0.527202	0.442642	0.551817	0	Pass
CAMK2B	0.787611	0	0.492909	0.313124	0.516638	0	Pass
INSM1	0.846918	0	0.680058	0.557429	0.696803	0	Pass
PEX5L	0.761985	0	0.589492	0.50319	0.602533	0	Pass
NOL4	0.75056	0	0.580734	0.475854	0.59108	0	Pass
SCG2	0.911241	0	0.751272	0.721271	0.762329	0	Pass
SCG3	0.938992	0	0.75947	0.798068	0.766183	0	Pass
VGF	0.891559	0	0.661234	0.687439	0.672745	0	Pass
DLL3	0.853802	0	0.633807	0.530667	0.651016	0	Pass
FST	0.73353	0	0.497521	0.264365	0.52125	0	Pass
CACNA1A	0.867536	0	0.718741	0.604476	0.733451	0	Pass
ESPL1	0.807432	0	0.653272	0.582238	0.668086	0	Pass
CA8	0.760036	0	0.538982	0.417608	0.561089	0	Pass
ST18	0.758639	0	0.578322	0.462407	0.592803	0	Pass
FFAR4	0.712063	0	0.59862	0.421956	0.574373	0	Pass
SCN3A	0.707652	0	0.570087	0.417885	0.554114	0	Pass
