# Supplementary material for: Defining the combinatorial nature of gene modules in prostate cancer underlying lineage plasticity and metastasis
Source: Research Square preprint supplement (doi:10.21203/rs.3.rs-9430776/v1), 2026-05-11
Supplement: Supplementary file 5 [file ffcb7ddcd6b13f6647737764.xlsx]

## Sheet: Sheet1
Supplementary Table 2. Gene modules identified in the prostate cancer single-cell atlas
	L1	L2	L3	L4	L5	L6	L7	L8	L9	L10	L11	L12	L13	L14	L15	L16	L17	L18	L19	L20	L21	L22	L23	L24	L25	L26	L27	L28	L29	L30	L31	L32	L33	L34	L35	L36	L37	L38	L39	L40	L41	L42	L43	L44	L45	L46	L47	L48	L49
Category	Biological Process	Lineage	Biological Process	Lineage	Biological Process	Lineage	Immune Response	Immune Response	Immune Response	Immune Response	Cellular Process	Cellular Process	Biological Process	Biological Process	Lineage	Prostatic hemeostasis	Biological Process	Lineage	PCa related Pathway	Lineage	PCa related Pathway	Cellular Process	Biological Process	PCa related Pathway	Cellular Process	Housekeeping	Housekeeping	Housekeeping	Housekeeping	Housekeeping	Housekeeping	Housekeeping	Housekeeping	Housekeeping	Housekeeping	Housekeeping	Housekeeping	Housekeeping	Housekeeping	Housekeeping	Housekeeping	Housekeeping	Housekeeping	Housekeeping	Housekeeping	Housekeeping	Housekeeping	Housekeeping	Housekeeping
Annotation	Hemaglobin	Secretory	Hemaglobin	Club	Stromal Remodelling	Secretory	Hematopoietic differentiation	Hematopoietic differentiation	MHC Class II	cytokine	DNA replication	Cycling kinase	Stromal Remodelling	Stromal Remodelling	Luminal	Metallotheoin	PD-1 Regulation	Luminal	AR pathway	Luminal	Rho GTPase Pathway	Cycling kinase	Nuclear transportation	AR pathway	Anti-apoptosis	lncRNA	Ribosomal	Ribosomal	Ribosomal	Ribosomal	Ribosomal	Ribosomal	Ribosomal	Ribosomal	Ribosomal	Ribosomal	Translation	Ribosomal	Ribosomal	Ribosomal	Ribosomal	Ribosomal	Ribosomal	Ribosomal	Ribosomal	Ribosomal	Ribosomal	Ribosomal	Ribosomal
	HBB	SLC25A37	HBA2	LRP1B	CDKAL1	S100A9	LYZ	CYBA	CD74	CXCR4	TUBA1B	HMGB2	TMSB10	TMSB4X	MSMB	MT2A	SOD2	SPON2	MAP1B	KLK3	PDLIM5	CKB	PRAC1	AR	MTRNR2L12	MALAT1	RPL41	RPL36A	RPL31	RPS21	RPS27	RPL39	RPL30	RPS15	RPS18	RPS19	RPS5	EEF1A1	RPS6	RPL8	RPS4X	RPL7A	RPS14	RPL13	RPS27A	RPL10	RPS2	RPS3A	RPL3
	HBG2	PTK2	HBA1	LAMP5	PDZRN3	S100A8	TYROBP	LGALS1	HLA-DRA	ARHGDIB	TUBB	PTTG1	ACTB	LIMD2	POTEM	MT1X	ANKRD36C	FOLH1	IFT57	KLK2	PPP3CA	CSRP2	AIDA	CRISP3	MTRNR2L8	CCDC39	TUBB4A	KRTCAP2	TMED6	RPL38	ASB9	RPS29	TMEM238	RPS28	RPS8	RPL32	RPS11	ADTRP	PCAT1	RPL18	RPS9	RPL15	RPS3	RPS12	RPL19	RPL28	CD163L1	RPL7	RPLP0
		ZCCHC7		ZNF385D	ZFY	S100A12	PLAC8	SRGN	APOE	RGS1	DEK	CENPF	LY6E	SPOCK2		MT1E	BIRC3	DNAH5	RGS2	CWH43	RAMP1	NXPH4	PRAC2	BANK1	PLAT			EPB41L4A-AS1	LRRC4B	GKAP1	LINC01091	TWIST1	CCNO	RPL36	RPL11	RPS24	EEF2		KCNC2	UQCRB	RPS13	RPL29			RPS23	RPL12		RPL9	NACA
		IMMP2L		ZFPM2	FHIT	CLMP	CORO1A	FXYD5	HLA-DRB1	CCL4	DUT	TOP2A	PCSK1N	RBFOX3		MT1G	LAMC2	PPFIA2	SGK1	SLC23A1	HSD17B4	NSG1	KCNK12	DIO2	PLCG2			ZNF667-AS1		MIR4458HG		TEKT4	LINC00327	GRIN1	ZSCAN1	RPL37A	LINC00665		TDRD1	RPS4Y1	RPL10A	RPS7			RPS16	RPL18A		NACA2	POLR1D
		PPP5C		STEAP1B	SDK1	CRP	FCER1G	PYCARD	HLA-DPB1	SAMHD1	RPA3	SMC4	LMO4	CD79A		MT1M	MALL	C1QTNF3	CADM1		MCCC2	ENHO	SSTR1	HTR1F	PIP			PTPRS		ZNF385B		FAM166B				RPL37	SLC38A11		NHLRC4	EIF3H	RPL5	RPL24			FAU
		SPIDR		PCDH11Y	RAD51B		AIF1	CTSC	HLA-DPA1	LAPTM5	CKS1B	MKI67	ABRACL	PPP1R14A		MT1F	EMP1	NCAM2	SDC2		DEGS1	DPYSL4	ENPP3	ADAM7	MTRNR2L4			U2AF1		S1PR3						RPL35A	RORB		CCL21	TRAPPC6A	EIF3E	RPL14			UBA52
		AGAP1		DSCAM	WWOX		GMFG	CARD16	APOC1	CELF2	ATAD2	UBE2C	CFD	MFNG		MT1H	CEACAM1	IL5RA	GP2		TMEFF2	NELL2	LINC00639	CDH10				PSMD9		APOLD1						RPS15A	FAM110B			RAC3	ALKBH7	RPSA			RPL22
		VPS13B		CA1	SNCA		MNDA	SAMD9L	HLA-DQB1	KCTD12	TMPO	UBE2T	ACAP1	RGS13		MT1A	MUC3A	LRRN3	SESN3		RHOU	NETO1		TRIM72				MAPKAPK5-AS1		NPTX2						RPL35	DSEL			SLC27A5	EIF3F				RPL23
		MAML3		ZNF521	CHST11		RETN	LY96	C1QB	CCL5	USP1	NUSAP1	NANOS1	SH2D3C		MIR155HG	GK	SLIT1	NEK1		PRUNE2	KCNJ12		PPP3R2				LINC00910		PDE1A						RPS26	DEPTOR			NCALD					EEF1B2
		NXN		SCGB2B2	GREM1		HCST	TGFBI	IL1B	GYPC	DNMT1	CDK1	AARD	P2RX1			LINC00342	APOF	ABCC5		NAALADL2	ZNF556		PGLYRP2				PSMB10		CNIH3							CCDC74A			GPC6					TOMM7
		CHST12		CDH4	GPM6A		VCAN	SLC43A3	C1QA	CCL4L2	MCM7	CDKN3	MRAS	ATP8B3			PRSS3		NRP1		LUZP2							LINC00623		SHOX2							CCSAP			XYLB					PFDN5
		FADS3		LRRC3B	SEMA3E		LST1	ARHGAP4	CCL3	PTPRC	DTYMK	CCNB1	CLDN23				SECTM1		ETV1		ADRB2							LTC4S		GLYATL2							NTM			TPPP					NBEAL1
		BMPR1A		CORO2B	RFX2		MPO	GPSM3	HLA-DMA	CD52	ANP32E	TPX2	CRLF1				ACHE		PRKCA		BICD1							OGN		HLX							CDH7								COMMD6
		TRAPPC9		OOEP	TGFB2		NKG7	RASSF4	HLA-DRB5	RAC2	KPNA2	CENPW	RENBP				MDFI		GTF2H2		SERHL2							PCDH9		FNDC5							SYCP3								ZNF90
		FRMD4A		DPP6	ULK4		AZU1	FMNL1	CD14	ITGB2	PCNA	ZWINT	HORMAD1				ADAMTS9		GDF11		TENM1							NBPF10		RBM24							NKAIN1								SLC11A1
		TTTY14		SLC22A16	TIAM1		CD37	CA2	A2M	CD69	SMC2	BIRC5	WDR86				BATF3		NOVA1		F5							PLCXD2		HPCA							PTGFR
		SAMD12		HEMGN	SYTL3		CD36	ADA	GPNMB	MEF2C	NUDT1	RNASEH2A	MMP17				IL1RN		BCHE		NUDT11							PSMG3-AS1		EYA1							GLIPR1L2
		EXT1		ST6GALNAC3	EXTL3		VPREB3	EREG	HLA-DQA1	ZEB2	MIS18BP1	PRC1	AMBP				KRTAP13-2		CPED1		PRR16							ZNF674-AS1		DRAXIN							CERS1
		SLC48A1		SLC12A1	NLRX1		EVI2B	VAV1	C1QC	FGL2	DNAJC9	GINS2					CD274		SRGAP3		POTEI							IQCH-AS1		ADAMTS5							CNTFR
		CBLB		NGF	MACROD2		CD79B	APBB1IP	LGALS9	GPR183	MCM3	CKAP2					HS3ST2		FBXL17		SNX22							LINC00960		FAM78B							EPHA3
		SZT2		HHIP	TTC28		FCN1	TMC8	CYBB	SLC2A3	SKA2	TYMS					NXPE2		CLSTN2		POTEE							ADAMTS6		PDZRN4							BMX
		PARD3B		IL2RA	SSTR2		RCSD1	THBD	MS4A6A	ALOX5AP	RFC2	CLSPN							EPHA4		POTEJ							UBAC2-AS1		TNNT2							GABRB2
		AAR2		LINC00544	TOX2		RNASE6	NCF1	IFI30	CCDC69	BRI3BP	CENPM							NAIP		SLC10A5							CBS		CERKL
		KAZN		LPAR4	MELK		SPN	CALHM2	IGSF6	WIPF1	RRM1	MAD2L1							COCH		PAPPA2							GPR85		NECAB1
		MAP2K5		MALRD1	ZNF862		SELL	SH2D2A	CSF1R	CD53	DBF4	ASPM							GTF2H2C		POTEF							THSD1		LINC00470
		CCSER1		CTNNA3	TENM2		CD163	FBLN5	MS4A7	TNF	EZH2	HMMR							CHN1		NR5A2							MNX1-AS1		SH2D6
		UBE2V1		FMO1	EDA		MS4A4A	FCHO1	BCL2A1	CD3D	FEN1	KIF20B							MCTP1									HGF		GRIA2
		RASGEF1B		SLCO1C1	DLG2		RASGRP2	RIN3	PLBD1	PHACTR1	BARD1	LMNB1							CORIN									KRBOX1		SPSB4
		BTBD9		ALPK2	SYNE1		RNASE2	TREM1	FCGR3A	IL7R	POLD3	ORC6							LEF1									SOX21-AS1
		COPG2		LIPN	NLGN4Y		CSF3R	KCNE3	IRF8	LSP1	MIS18A	CCNB2							DPY19L2									SCARF2
		KIF27			CLNK		PARVG	CSF2RA	ADAP2	MYO1F	MCM4	NUF2							B3GNT6									IAPP
		PTPRD			FGFR2		PRKCB	ICAM2	STAB1	LTB	CKLF	CENPU							DGKB
		PLEKHA7			GPC4		FLI1	THEMIS2	MSR1	SAMSN1	PHF19	CENPE							EPHB2
		CYP7B1			CASC15		LY86	ADCY7	CLEC7A	CD7	RFC4	TK1							NIPSNAP3B
		MCM9			CENPP		EVI2A	CARD11	PTAFR	PREX1	ECT2	ANLN							PDE7B
		INVS			PEAK1		FGR	ARL11	HLA-DOA	TNFRSF1B	LRRCC1	CDC20							SH2D1A
		FANCC			RARB		CFP	ABCG2	FGD2	PLEK	KNSTRN	FAM111B							EFHC2
		JAZF1			ROBO2		LILRB4	AIM2	HLA-DQA2	SERPINB9	ACOT7	RRM2							SV2C
		ARID3B			ARHGAP15		GAPT	CCRL2	MPEG1	PIK3AP1	HAUS1	BRCA1							MYO3B
		FAM184B			EPHA6		S1PR4	C5AR2	OLR1	CD2	LMNB2	GTSE1							GLRA3
		NR6A1			DOK6		FPR1	CATSPER1	SLC15A3	GNLY	DHFR	MYBL2							SUCNR1
		ZRANB3			FAM107A		SELPLG	METTL7B	FCER1A	CD48	DCK	AURKA							GPR22
		TIAM2			SGCD		PRAM1	MARCO	HP	HCK	CNTRL	DLGAP5							GALR1
		CROCC			MSX1		TFEC	SERPINA5	CD86	ITGA4	VRK1	FBXO5
		FCHSD2			DENND5B		RGS18		TREM2	TNFSF13B	MPHOSPH9	TACC3
		WDPCP			KALRN		FLT3		MILR1	SLA	GPSM2	FANCI
		ARHGAP39			RBMS3		CLEC12A		CD1C	SH2B3	MCM6	PBK
		BCORL1			CCDC171		TMEM71		SLC7A7	GZMA	MCM5	PLK1
		CAP2			RYR2		CRHBP		SPIB	RHOH	TEX30	RAD51AP1
		BBS9			CNKSR2		LILRA2		SIGLEC10	FCGR2A	RFC3	CDT1
		ARL17B			KCNJ3		FCGR1A		CD72	PLXNC1	PHTF2	TROAP
		MOB3B			LRRC69		BST1		TLR1	IRAK3	RBM38	NDC80
		AGBL3			LRRC4C		LILRB2		SLCO2B1	IL2RG	LRR1	E2F1
		TMC1			DNAH7		KCNE1		PLD4	FERMT3	CHEK1	CENPA
		MMP26			ZNF367		LRRC25		C3AR1	ARHGAP30	NCAPD2	CDCA3
		ARHGEF4			FAM183A		LGALS2		BTK	CYTIP	RFC5	CENPK
		SOX6			PLCL1		LILRA5		CARD9	GIMAP2	CDCA4	PARPBP
		PDZD2			NLGN1		GFI1B		ITGAX	LAIR1	SPDL1	KIF11
		PTPRR			CEP128		NRROS		FPR3	LCK	LIG1	FOXM1
		GPRIN2			CACNB2		CLEC4E		GPR34	IKZF1	CENPH	CDCA8
		ZNF425			KLHL29		LINC01013		VSIG4	RUNX3	RGS19	NCAPG
		ZNF66			DOCK11		CD300C		HLA-DQB2	GZMB	CCNE2	CDCA5
		CABLES1			RNFT2		CLEC9A		SDS	TAGAP	PRIM1	CCNA2
		ADAM2			PAQR8				WDFY4	INPP5D	DSN1	CEP55
		TPK1			KLF12				TM6SF1	ARHGEF6	ATAD5	MXD3
		ARMC2			CNTN4				BPI	LCP2	SH3KBP1	AURKB
		MCMDC2			PDE3A				GAL3ST4	OASL	MNS1	RACGAP1
		LEKR1			MED12L				TLR7	KLRB1	FIGNL1	BRCA2
		RERG			KCNJ6				CD1D	CD93	TIMELESS	KIFC1
		KIAA0825			GRM7				LILRB1	CD3E	PSMC3IP	MND1
		TBL1Y			GRIP1				FCGR2B	MYO1G	CEP57L1	ARHGAP11A
		TTLL11			TEX14				CCL8	PTPN7	CEP152	DEPDC1
		ZNF490			AGBL4				P2RY13	GIMAP4	DPYSL2	HCLS1
		FBXL14			ERBB4				CLEC10A	C5AR1	KCNH2	ASF1B
		MAP3K7CL			COL25A1				CD180	LAT	MDM1	SPC25
		BCL2L14			EYS				SLAMF8	NCKAP1L	DONSON	CDC6
		EPHA10			PRKG1				ADAMDEC1	CST7	SLC25A19	WDR76
		CDKL1			RELN				ADORA3	ARHGAP25	MCM2	KIF4A
		EFCAB6			PACRG				OTOA	RASSF2	ARRB2	HJURP
		KLHL13			CYSLTR2				TLR10	NCF4	CENPQ	PKMYT1
		IL7			ZMYND10				CD300LB	CD4	DSCC1	TCF19
		LMOD3			ROR1				CLEC4F	STX11	POLA2	BUB1B
		SUGCT			ATP8A2					CYSLTR1	MMS22L	FAM83D
		LINC00571			CDHR3					SPI1	SKP2	DIAPH3
		GRIK1			MAK					GIMAP7	NCAPG2	CIT
		SH3TC2			KCND2					DOCK2	RTKN2	POC1A
		BHLHA15			DNAH6					CD84	CENPL	NEK2
		ANKLE1			AK7					BCAT1	FANCA	CDC45
		LDHC			CCDC173					NCF2	TRIP13	ESCO2
		PRR5L			SOX5					VASH1	HAUS8	SPAG5
					HYDIN					IFNG	MASTL	BUB1
					GALNT15					CD3G	RMI2	GAS2L3
					GPR137C					WAS	CHTF18	CKAP2L
					KCNQ5					ENTPD1	CCDC18	KIF2C
					DNAH9					CD8A	CDCA7	KIF14
					NEK10					AOAH	CCNF	MCM10
					IL1RAPL1					IL10RA	TBC1D31	KIF15
					RBPMS2					KBTBD8	KNTC1	NCAPH
					NLGN4X					PIK3CD	RBL1	PRR11
					LINC00271					CD96	MBNL3	SKA3
					LINC00882					IKZF3	WDHD1	CDCA2
					LINC00578					LRRK2	CHAF1B	CPVL
					ERVMER34-1					ITGAM	FANCD2	BLM
					BRINP1					TRAF3IP3	FANCG	SPC24
					PCSK5					LRRC8C	INCENP	SHCBP1
					FHOD3					ITGB7	STIL	TTK
					EFCAB1					BIN2	NRM	GINS1
					FBXL13					GPR65	OSBPL3	PSRC1
					GNA14					SUSD3	SLFN13	DTL
					NPAS1					ARHGAP9	WRAP53	KIF18A
					FRMPD4					DOK2	DNA2	RAD51
					ROPN1L					DOK3	POLE2	DEPDC1B
					LRRTM4					IL16	ANKRD44	E2F8
					LINC00937					TBC1D10C	KATNAL1	KIF20A
					GRIK2					ARHGAP31	CEP85	MYBL1
					KCNB1					OSM	ZNF519	BRIP1
					CALN1					TNFSF14	NEURL1B	OIP5
					UPB1					CTSW	FAM184A	MTFR2
					EBF3					ABI3	TRIM59	PIF1
					RGS7BP					TNFAIP6	CENPO	EXO1
					GAS2					MIR181A1HG	TONSL	NEIL3
					IL12RB2					GZMK	CHEK2	E2F7
					EFCAB10					ST8SIA4	POLD1	ARHGEF39
					KCNN3					RASAL3	DERL3	WDR62
					SPEF1					GZMM	MTBP	PLK4
					MAP3K19					PTPN22	LIN9	IQGAP3
					GRIA3					HAVCR2	POPDC3	POLQ
					DNAH3					GBP5	XRCC2	SKA1
					DNAH2					IRF4	CABLES2	CDC25C
					CTNNA2					GZMH	ZNF530	BCL11B
					RSPH9					GIMAP1	ASGR1	RFTN1
					CACNA2D3					CLEC5A	KCNAB2	E2F2
					NFAM1					CD300A	FANCB	RAD54L
					SPAG17					KLHL6	CDC25A	KIF18B
					DNAH12					CD247	XRCC3	NRGN
					HECW2					KLRD1	SLFN11	GNAO1
					CNTNAP5					P2RX7	SUV39H1	AUNIP
					BNC2					HVCN1	RAD54B	ORC1
					HEATR4					ITGAL	ARHGAP33	ERCC6L
					ADAMTS10					APOBR	RGS9	FBXO43
					RSPH4A					ADAM19	GINS4	CENPI
					DCDC1					HIC1	GINS3	KIF24
					LINC00861					NLRP3	UNC13D	EME1
					SLC4A10					MRC1	CDC7	MICB
					SYN3					KLRC1	DCLRE1B	DMC1
					ABCB1					PYHIN1	RASGRP1	XCL1
					TTC29					PTGER2	HPSE	TICRR
					LINC00862					JAK3	PLCL2	FAM72D
					TMEM132B					STAT4	AGPAT4	FAM72B
					PLXNA4					IL10	BORA	SLAMF1
					FAM182B					SLAMF7	TRAIP
					CDH17					XCL2	CDH24
					ABI3BP					CXCL13	RYR1
					IL12RB1					SASH3	IPCEF1
					MAP3K15					CLEC4A	CSPG5
					TEX41					GPR171	TP73
					ZNF804A					SCIMP	CCDC150
					DNAH17					PIK3CG	FGD3
					USH2A					CYTH4	RIMS3
					TDRD9					CAMK4	PDE6B
					RGS6					TMEM156	ZNF208
					PIEZO2					PRF1	TTYH2
					LRRC36					GAB3	MB21D2
					TG					CD27	ZNF730
					PLCXD3					ICOS	MIR503HG
					ABCC9					CCR7	ENPEP
					LINC00877					CD6
					CSMD2					PPP1R16B
					VWA3A					SP140
					GRIN2A					GIMAP6
					ANGPTL1					CCR1
					ATP6V0D2					SPNS3
					MGAM					ITK
					DGKI					GIMAP8
					PTH2R					IL2RB
					OMG					CD28
					HMCN1					KCNMB1
					NIM1K					SIT1
					GRIN2B					PIK3R5
					NAALAD2					RGL4
					HSD11B1					AQP9
					NCR1					TIGIT
					ZNF295-AS1					CD5
										GPR132
										TNFRSF9
										P2RY10
										TRAT1
										CCR5
										TNIP3
										CRTAM
										P2RY14
										CD22
										CXCR3
										CXCR6
										MS4A1
										DTHD1
										CD40LG
										ZNF683
										SLFN12L
										MS4A2
										GPR84
										KLRF1
										CD300E
										KLRK1
										SLAMF6
										FASLG
										SIRPG
										FCGR3B
[truncated: 117 more columns]
